# Supplementary material
Source: PubMed Central journal article supplement (PMC5969998)
Supplement: NIHMS966427-supplement-supplements.pdf [file NIHMS966427-supplement-supplements.pdf]

## Supplementary Materials for

### **CD169<sup>+</sup> macrophages orchestrate innate immune responses by regulating bacterial localization in the spleen**

Oriana A. Perez, Stephen T. Yeung, Paola Vera-Licona, Pablo A. Romagnoli, Tasleem Samji, Basak B. Ural, Leigh Maher, Masato Tanaka, Kamal M. Khanna\*

\*Corresponding author. Email: kamal.khanna@nyumc.org

Published 6 October 2017, *Sci. Immunol.* **2**, eaah5520 (2017)  
DOI: 10.1126/sciimmunol.aah5520

#### **The PDF file includes:**

##### Materials and Methods

Fig. S1. Characterization of WT and CD169-DTR mice.

Fig. S2. Splenic CD169<sup>+</sup> macrophages are essential for protection against various blood-borne pathogens.

Fig. S3. Sorting strategy and quality control for RNA sequencing.

Fig. S4. CD169-DTR mice have elevated but displaced cytokine production.

Fig. S5. CD169<sup>+</sup> macrophages recruit CD8 $\alpha$ <sup>+</sup> DCs to early sites of infection.

Fig. S6. Characterization of CD8 $\alpha$ <sup>+</sup> DCs in CD169-DTR mice.

Fig. S7. Myeloid cell differentials comparing *Batf3*<sup>-/-</sup> knockout and CD169-DTR-*Batf3*<sup>-/-</sup> knockout mice.

Fig. S8. Model depicting the role of CD169<sup>+</sup> macrophages after *Lm* infection.

Table S1. Top 15 GO enriched biological processes up-regulated in CD169<sup>+</sup> macrophages versus red pulp macrophages at steady state.

Table S2. Top 15 GO enriched biological processes up-regulated in CD169<sup>+</sup> macrophages during infection versus steady state.

Table S3. Top 15 GO enriched biological processes down-regulated in CD169<sup>+</sup> macrophages during infection versus steady state.

Table S4. List of identified TF candidates for up-regulated genes in CD169<sup>+</sup> macrophages isolated from infected mice versus uninfected mice.

Table S5. Enriched immune-related GO terms for corresponding TFs in CD169<sup>+</sup> macrophages during infection versus steady state.

Table S6. Antibodies used for fluorescence-activated cell sorting (FACS) and confocal microscopy.

Legends for movies S1 to S3  
References (36–38)

**Other Supplementary Material for this manuscript includes the following:**  
(available at [immunology.sciencemag.org/cgi/content/full/2/16/eaah5520/DC1](http://immunology.sciencemag.org/cgi/content/full/2/16/eaah5520/DC1))

Movie S1 (.mov format). *Listeria* is captured by CD169<sup>+</sup> macrophages early after infection.

Movie S2 (.mov format). *Listeria* is captured by CD169<sup>+</sup> macrophages early after infection.

Movie S3 (.mov format). CD169<sup>+</sup> macrophages transfer bacteria to CD8 $\alpha$ <sup>+</sup> DCs.  
Source data (Excel file)

## **Materials and Methods**

Cell sorting and purification for RNA sequencing: Spleen cells from naïve or infected (12 hrs post infection) C57BL/6J mice were isolated as described above. Leukocytes obtained were negatively enriched (depleted B220, CD3, NK1.1, and GR-1) using STEMCELL Technologies and negatively selected cells were pooled. Enriched fractions were stained for live-dead marker, CD11b, CD11c, MHCII, CD8 $\alpha$ , CD169, F/480, B220, NK1.1, and GR-1 (Table S6). CD169+ and F4/80+ cells were sorted on a Becton-Dickinson FACS Aria II. RNeasy Plus Microkit (Qiagen) was used to extract total RNA from sorted cells. RNA integrity was validated using an Agilent 2100 Bioanalyzer, and only samples with RIN values  $\geq 7$  were used (Fig. S3B)

RNA-sequencing and data-set analysis: RNA-Sequencing libraries were prepared using the Illumina TruSeq Stranded mRNA library kit at the Center for Genome Innovation at UCONN Storrs, CT. The individual libraries were pooled together and run over 2 lanes on the Illumina HiSeq2500. Trimmomatic v0.32 was used to remove adapter sequences and bases with base quality lower than three and trimmed reads were mapped to reference genome (GRCm38.p84) with TopHat (v.2.0.13). G option on Cufflinks (v.2.2.1) was used for transcript assembly and FPKM quantification. Data was normalized using log<sub>2</sub> transformation with 1 was added to the raw signal (FPKM+1) followed by quantile normalization using the preprocess Core package in R. From a total of 47,443 genes, 30,107 were excluded and only 17,336 differentially expressed genes were used for statistical analysis. To ensure reproducibility between biological replicates, Pearson correlation coefficients were calculated on the log<sub>2</sub>(FPKM+1) values and coefficient values ranged from 0.98-0.9 (Fig. S3C). Similarly, genes showed clear separation between CD169+ macrophages from naïve and infected mice as well as concordance among group

replicates. Statistical analysis was performed using fold change and Independent T-test per comparison pair. The up-regulated genes were filtered using  $FC \geq 2$  and  $FDR < 0.05$ . Down regulated genes were filtered using  $FC \leq -2$  and  $FDR < 0.05$ . These differentially expressed genes are graphically depicted in heatmaps with hierarchical clustering using z-scores. For the identified up- and down-regulated differentially expressed genes in each comparison group, we performed a gene ontology (GO) enrichment analysis using geneXplain bioinformatics software platform (v. 2017.1) and its PROTEOME database. The top fifteen GO terms, according to p-values, were reported for different comparison groups and with a threshold for p-value  $\leq 10^{-4}$ . The sets of up- and down-regulated genes identified in each comparison were subjected to the promoter analysis using TRANSFAC (36). Each promoter was defined as the sequence within -500 to +100 coordinates, where the TSS of the main transcript of each gene was the point 0. The TFBS search on promoter sequences was done using the MATCH algorithm (37, 38) integrated in the GeneXplain platform and executed within the pre-defined workflows. In each comparison group, we used an enrichment fold (FE)  $\geq 1.5$ .

Bacteria quantification: Tissues were processed into single cell suspensions and were incubated at 4°C in 1% saponin for 1 hour. Tissue lysates were plated on brain heart infusion (BHI; Becton-Dickinson) agar containing 50 µg/ml streptomycin. Streaked BHI plates were incubated overnight at 37°C. Equal volumes of whole blood was collected and blood cells were lysed in 1% saponin. Whole blood lysates were plated on BHI agar and incubated overnight at 37°C. FACS sorted cell populations were incubated at 4°C in 1% saponin for 1 hour. Cell lysates were plated on BHI agar and incubated overnight at 37°C.

Flow cytometry: Spleens were incubated in RPMI containing 10% FCS and 100 U/mL collagenase IV for 30 minutes at 37°C. Subsequently the treated splenic tissue was dissociated into single cell suspension, treated with Tris-buffered ammonium chloride (TAC), and remaining leukocytes were stained for live-dead (Invitrogen, A-10168), CD45, CD11b, CD11c, CD169, CD8 $\alpha$ , NK1.1, CD3, MHCII, F4/80, Ly6C), Ly6G or CCR2 (Table S6). Cell suspensions were fixed and acquired using a Becton-Dickinson LSR-II. Cellular differentials were analyzed using FlowJo software.

Confocal microscopy: Spleen tissue was fixed overnight at 4°C in PFA, lysine, and periodate (PLP) buffer and dehydrated in 30% sucrose overnight prior to embedding in OCT.

Cryopreserved spleen tissue was sectioned and stained in 1X phosphate-buffered saline (PBS) containing 2% FCS, 2% goat serum, 0.5% Fc block and 0.05% Tween-20. Staining buffer was supplemented with 0.3% Triton-X for intracellular cytokine stains. Spleen sections were stained for L.m., CD169, CD11c, CD11b, Ly6G, B220, CD8 $\alpha$ , NK1.1 or IFN- $\gamma$  (Table S6). Images were acquired on a Zeiss LSM 780 microscope using Zen software from Carl Zeiss.

Confocal imaging analysis: Confocal images were analyzed using Imaris x64 version 7.7.0 (Bitplane). Where noted, spot detection minus background was used to render bacteria and in-situ IFN- $\gamma$  stain. CD8 $\alpha$ <sup>+</sup> DCs were identified using the Colocalization function of the Imaris software where CD11c and CD8 $\alpha$  co-expression on cells was determined using a colocalization coefficient. Isosurface function of the ImarisXT was used to construct 3D isosurface of the macrophage cell volume using the fluorescence of CD169 surface stain and threshold was adjusted to separate object from background. To quantify bacteria that were inside or outside the

CD169+ macrophages spots of bacteria were color coded and masked to determine whether the bacteria were intracellular or extracellular of isosurfaced object.

Multiplex: Cytokine and chemokine protein was quantified from spleen lysate using Mouse Cytokine 23-plex Assay (Biorad).

Statistics: All statistical analyses were performed using Prism GraphPad Software. For experiments comparing 2 groups, two-tailed Student t-test was used to determine statistical significance; p values <0.05 were considered significant. For bacterial quantification experiments non-Gaussian distribution was assumed and Mann-Whitney test performed. For experiments comparing three or more groups one-way ANOVA, Bonferroni test was used to determine statistical significance for sample groups that assume Gaussian distribution or Kruskal-Wallis H test with sample groups that assume non-Gaussian distribution; p values <0.05 were considered significant. Data are represented as mean  $\pm$  SEM, unless otherwise specified.

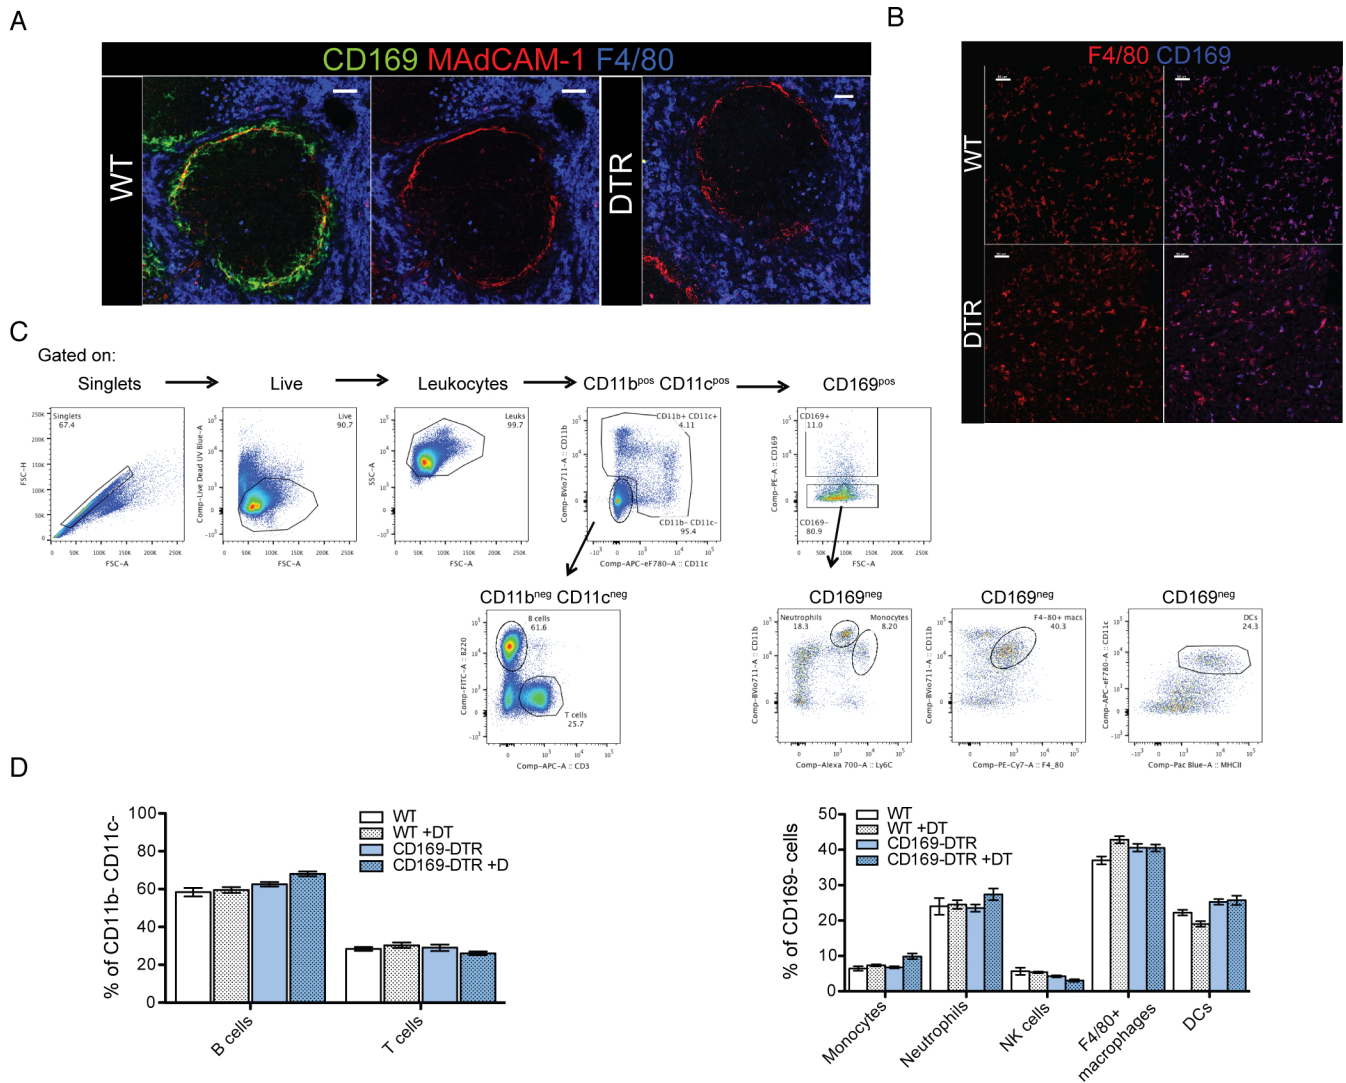

Fig. S1. Characterization of WT and CD169-DTR mice. (A) Representative confocal images of spleen sections depicting CD169<sup>+</sup> macrophage depletion in CD169-DTR mice, but normal MadCAM-1<sup>+</sup> cells in the marginal sinus. Scale bar, 50  $\mu$ m. (B) Confocal images of liver sections from WT mice or CD169-DTR mice 24 hpi stained for F4/80 and CD169. Scale bar, 80  $\mu$ m. (C) Representative FACS plot gating strategy of immune cell in naive spleen of WT mice. (D) Frequency of monocytes, neutrophils, NK cells, red pulp macrophages (F4/80<sup>+</sup>), DCs, B cells and T cells in spleens of naive WT mice or CD169-DTR mice untreated and 48 hours post diphtheria toxin treatment. Shown as mean  $\pm$  SEM, n=4, representative of 3 separate experiments.

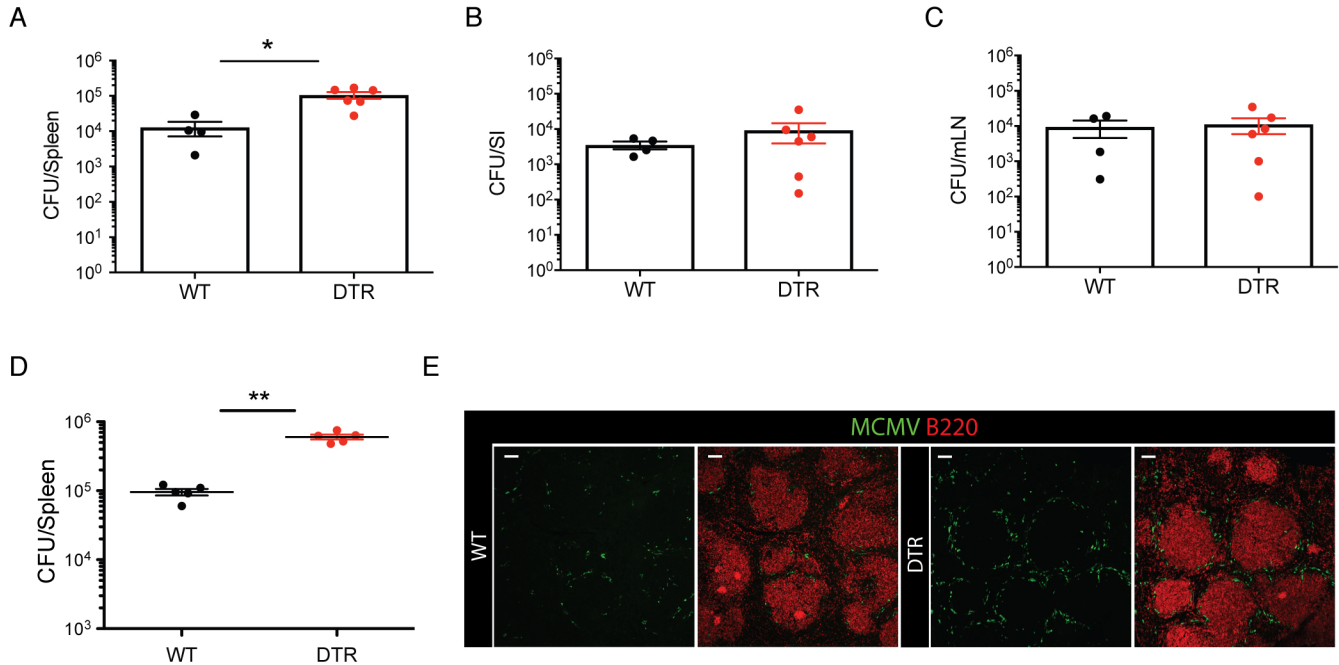

Fig. S2. Splenic CD169<sup>+</sup> macrophages are essential for protection against various blood-borne pathogens. (A-C) *L.m.* quantification from (A) spleen (B) small intestine and (C) mesenteric LNs of WT or CD169-DTR mice 2 days post oral infection with *L.m.* Each symbol represents an individual mouse, shown as mean  $\pm$  SEM (\*  $p < 0.05$  Mann-Whitney). (D) *E. coli* quantification from spleens of WT mice or CD169-DTR mice at 24 hpi. Each symbol represents an individual mouse, shown as mean  $\pm$  SEM (\*\*  $P < 0.005$ , Mann-Whitney). (E) Confocal images of WT mice or CD169-DTR mice 72 hpi with MCMV-GFP. Spleen sections were imaged for MCMV and B cells. Scale bar, 100  $\mu$ m. All data are representative of 2 separate experiments with 3-6 mice per group.



A

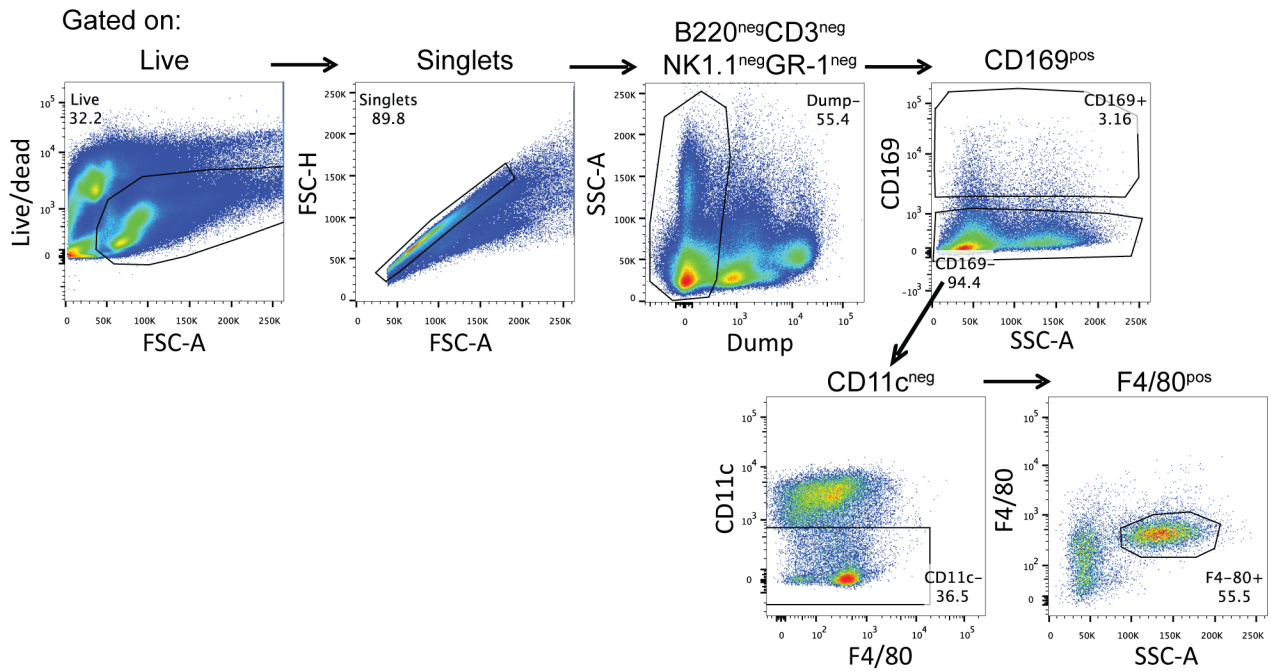

B

**Electrophoresis File Run Summary**

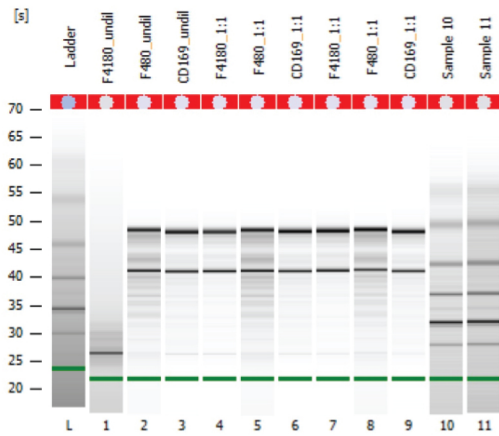

C

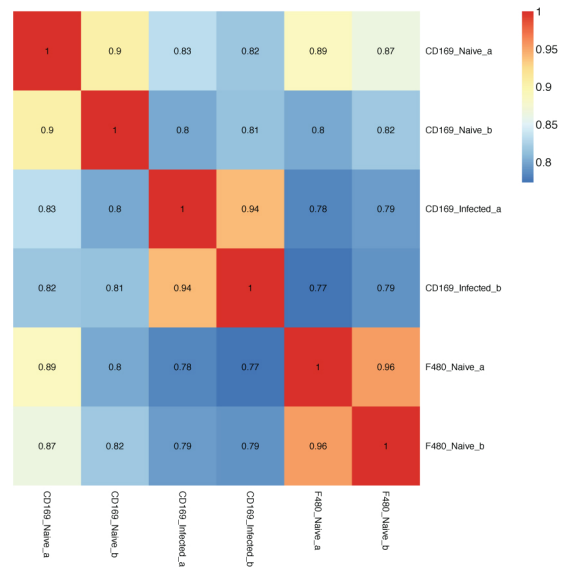

Fig. S3. Sorting strategy and quality control for RNA sequencing. (A) General gating strategy used to sort total CD169+ macrophages and F4/80+ red pulp macrophages from spleens prior to RNA sequencing. (B) Representative gel image of high sensitivity RNA ScreenTape used to determine RNA integrity. Image was scaled to sample and scaled to view larger molecular weight range (contrast 50%). (C) Correlation matrix of Pearson's coefficient of the RNA sequencing libraries. Values are based on the Log<sub>2</sub>(FPKM+1) of 17,336 genes that were used for downstream statistical analysis.

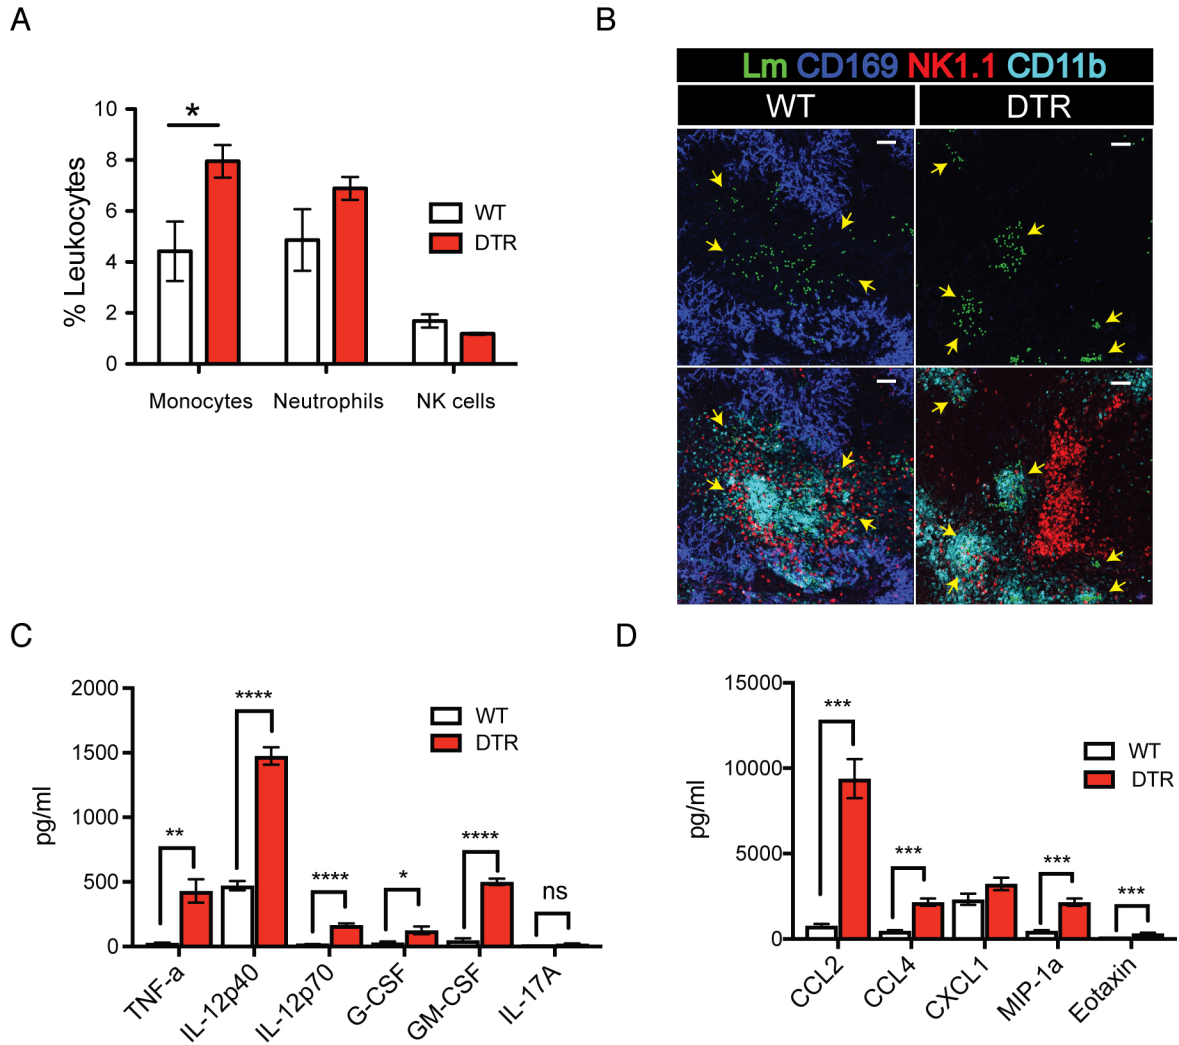

Fig. S4. CD169-DTR mice have elevated, but displaced inflammatory cytokine production. (A) Frequency of splenic monocytes (CD11b+ Ly6C+), neutrophils (CD11b+ Ly6G+), and NK cells (CD11b+ NK1.1+) in spleens of WT mice or CD169-DTR mice at 24 hpi. Shown as mean  $\pm$  SEM, n=4 (\*p<0.05, Student T-test). (B) Confocal microscopy of WT mice or CD169-DTR mice at 24 hpi. Spleen sections were stained for L.m. (green), CD169 (blue), NK1.1 (red) and CD11b (light blue). L.m. rendered using Spots and are indicated in green by yellow arrows. Scale bar, 50  $\mu$ m. (C-D) Multiplex luminex assay of (C) inflammatory cytokines and (D) chemokines quantified from spleen lysate of WT mice or CD169-DTR mice at 24 hpi. Shown as mean  $\pm$  SEM, n=4 (\*p<0.05, \*\*p<0.005, \*\*\*\*p<0.0001, Student T test). All data are representative of 2-4 separate experiments with 3-4 mice per group.

A

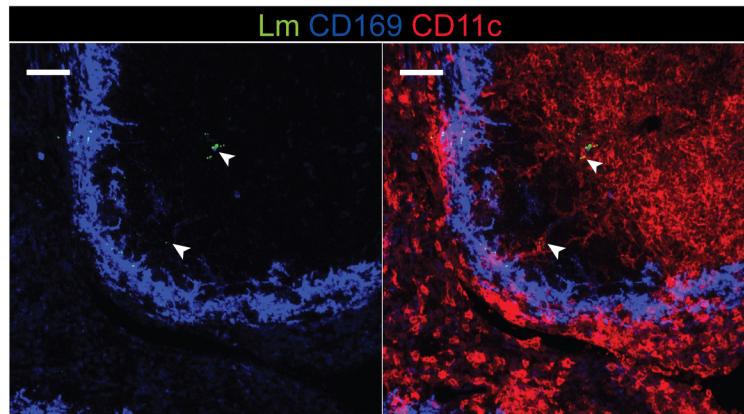

B

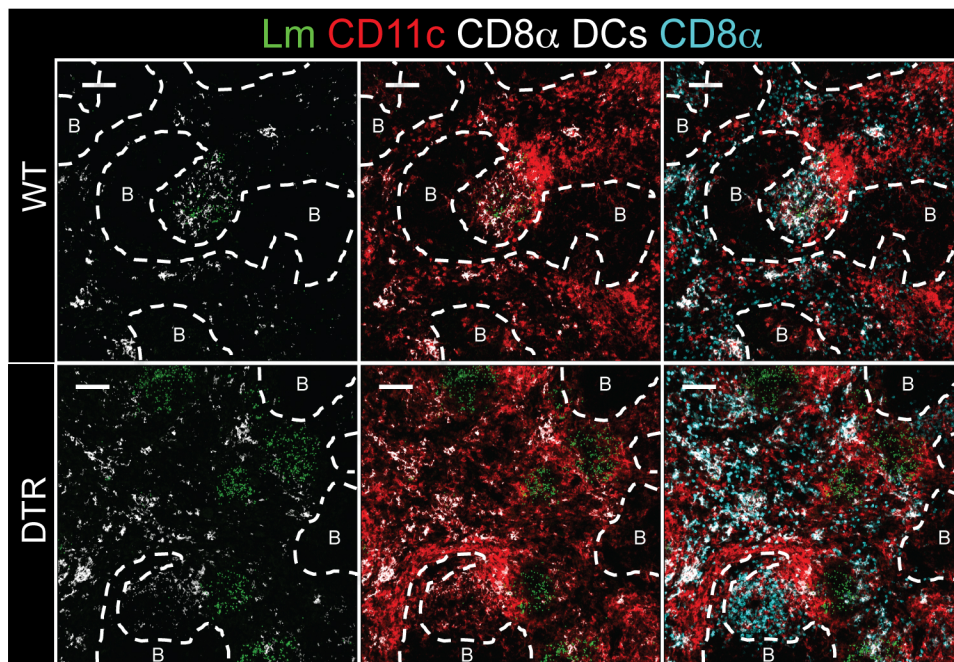

Fig. S5. CD169<sup>+</sup> macrophages recruit CD8 $\alpha$ <sup>+</sup> DCs to early sites of infection. (A) Confocal images of WT mice at 12 hpi. Spleen sections stained for Lm (green), CD169 (blue) and CD11c (red). Colocalization of CD11c and CD8 $\alpha$  is shown in white. Scale bar, 50  $\mu$ m. (B) Confocal images of spleen sections from WT or CD169-DTR mice 15 hpi. Stained for L.m. (green), CD11c (red), and CD8 $\alpha$  (light blue). Colocalization of CD8 $\alpha$  and CD11c shown in white and L.m. rendered using Spots. Scale bar, 70-80  $\mu$ m. All confocal data are representative of 3 separate experiments with 2-4 mice per group.

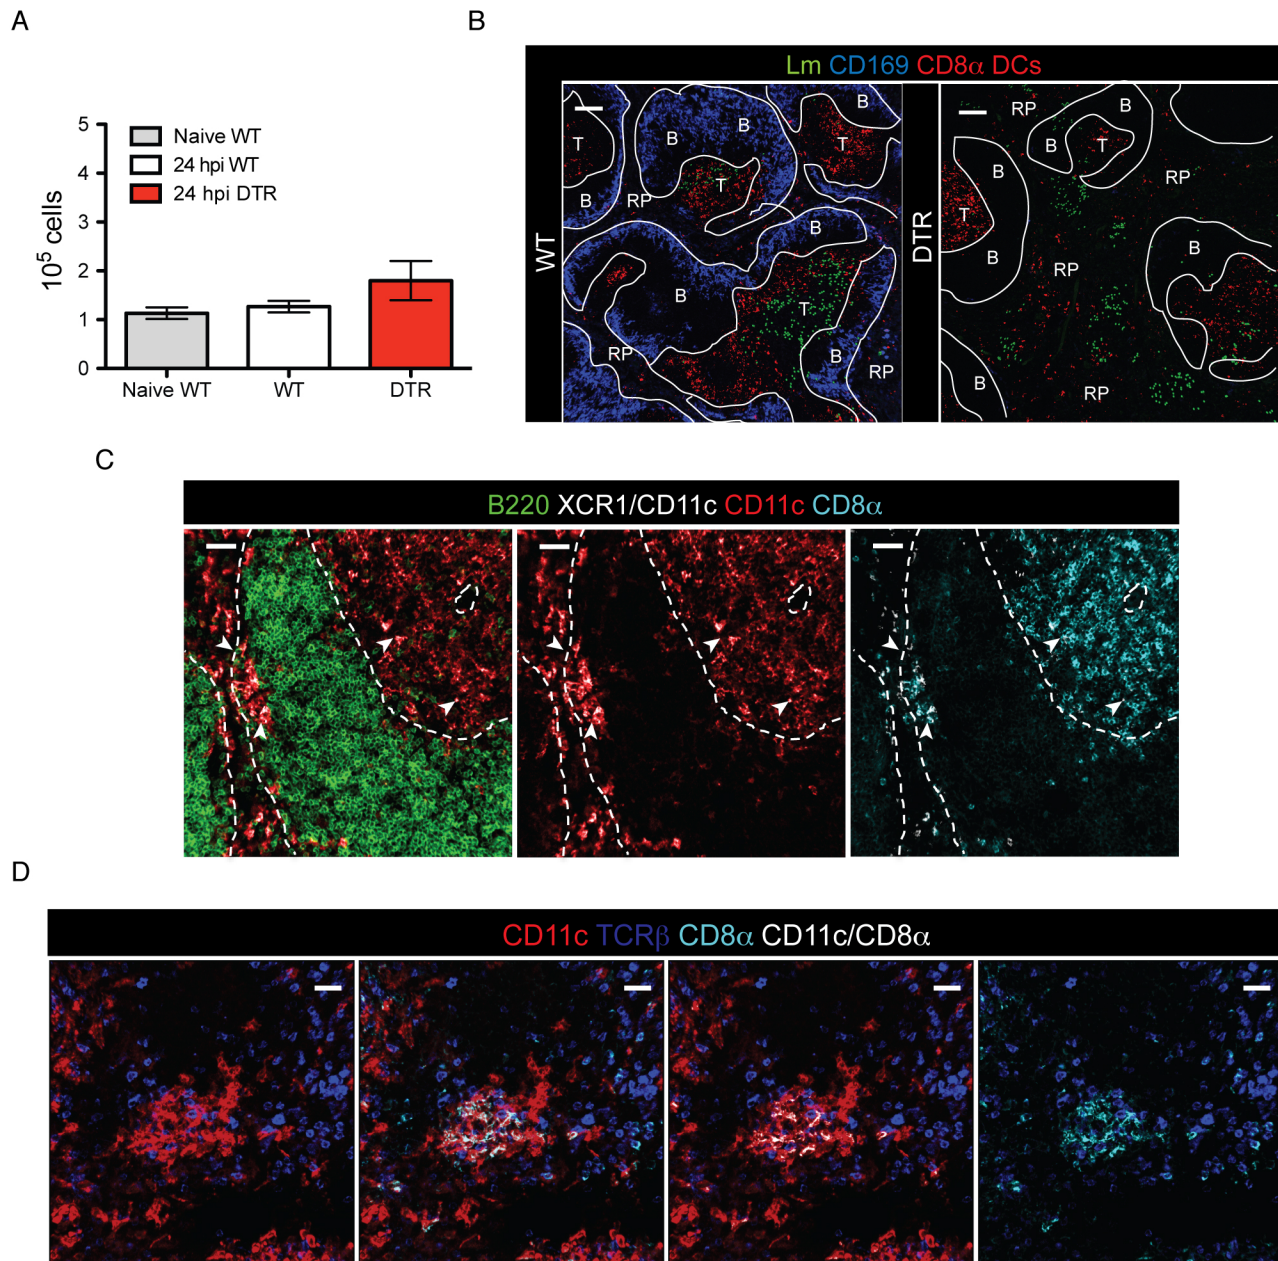

Fig. S6. Characterization of CD8 $\alpha$ + DCs in CD169-DTR mice. (A) FACs quantification of CD8 $\alpha$ + DCs in WT or CD169-DTR mice. Shown as mean  $\pm$  SEM,  $n=3$ . (B) Confocal images of CD8 $\alpha$ + DCs in WT mice or CD169-DTR mice at 24 hpi. L.m. are shown in green, CD169 stain is shown in blue and colocalization of CD11c and CD8 $\alpha$  is shown in red. Lm rendered using Spots. Scale bar, 100  $\mu$ m. (C) Confocal image of WT spleen section 6 hpi. Stained for XCR1 and CD11c. Colocalization of XCR1 and CD11c shown in white. CD11c, CD8 $\alpha$ , and B220 are shown in red, light blue, and green, respectively. Scale bar, 30  $\mu$ m. (D) Confocal image of WT spleen section 6 hpi. Stained for CD11c (red), TCR $\beta$  (dark blue), and CD8 $\alpha$  (light blue). Colocalization of CD11c and CD8 $\alpha$  shown in white. Scale bar, 30  $\mu$ m. All data are representative of 3 or more separate experiments with 2-3 mice per group.

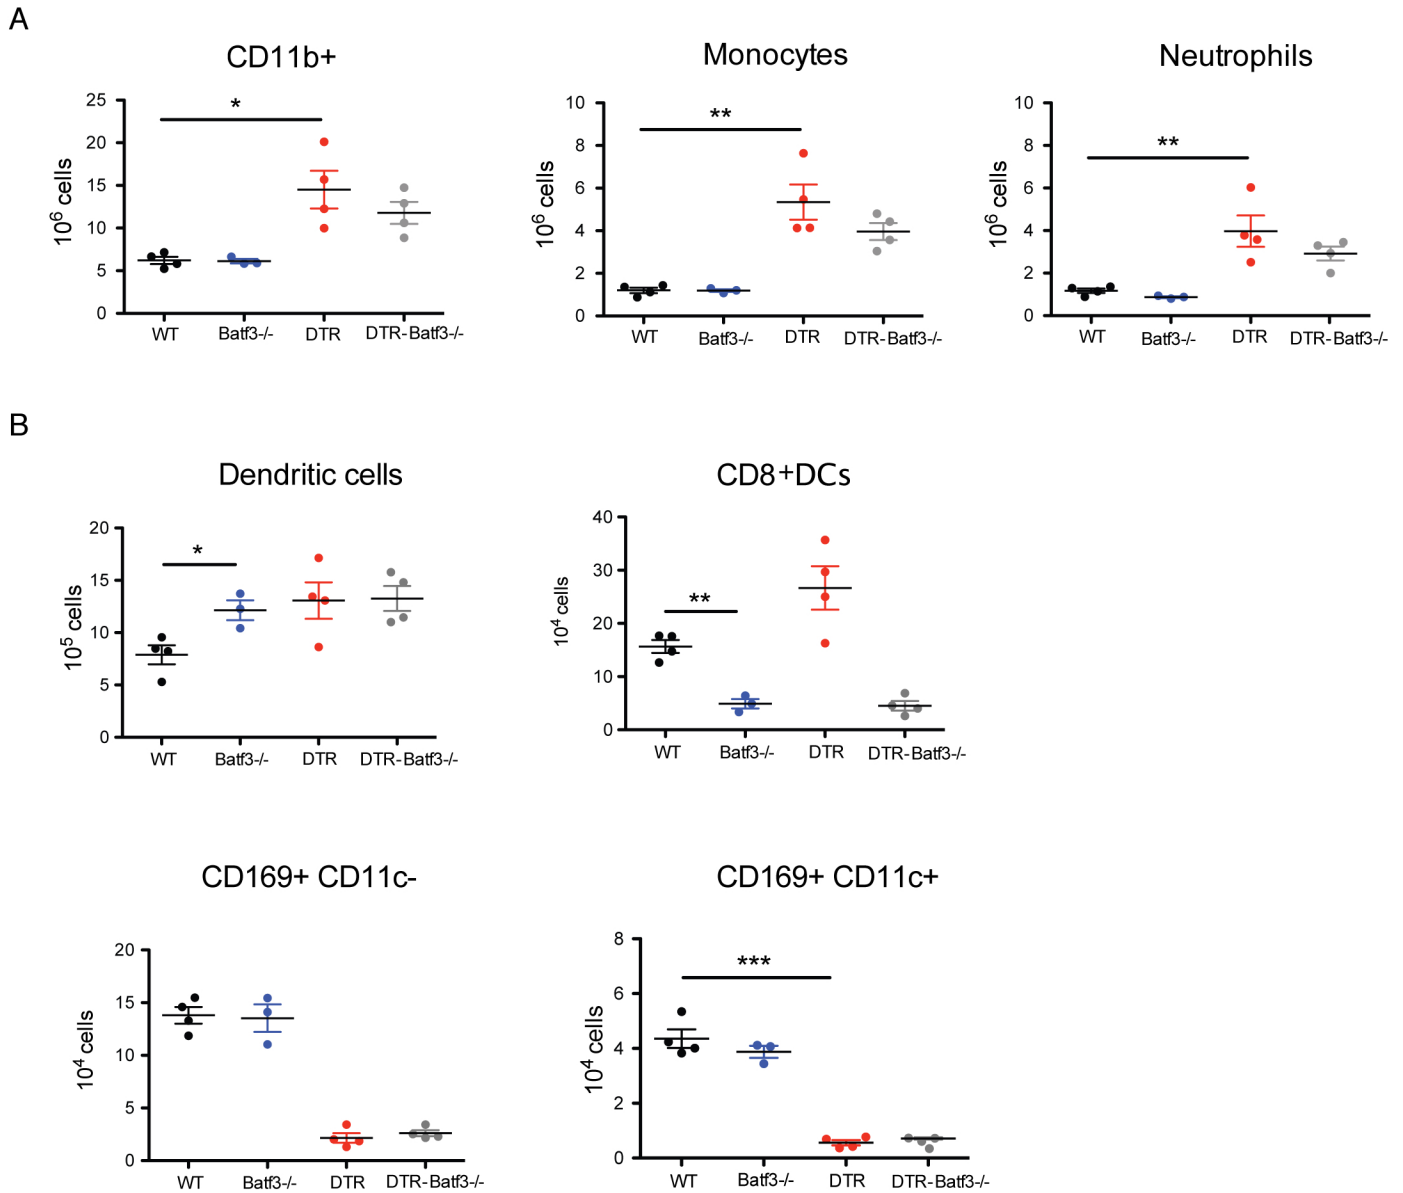

Fig. S7. Myeloid cell differentials comparing *Batf3*<sup>-/-</sup> and CD169-DTR-*Batf3*<sup>-/-</sup> mice. (A) Total number of CD11b<sup>+</sup> cells, monocytes (CD11b<sup>+</sup> Ly6C<sup>+</sup>), and neutrophils (CD11b<sup>+</sup> Ly6G<sup>+</sup>) in the spleens of WT, CD169-DTR, *Batf3*<sup>-/-</sup>, or CD169-DTR-*Batf3*<sup>-/-</sup> mice at 24 hpi. Each symbol represents an individual mouse shown as mean  $\pm$  SEM. (B) Total number of DCs and CD169<sup>+</sup> macrophages in the spleens of WT, CD169-DTR, *Batf3*<sup>-/-</sup>, or CD169-DTR- mice at 24 hpi. Each symbol represents an individual mouse shown as mean  $\pm$  SEM (\* P<0.05, \*\* P<0.005, \*\*\* P<0.0005, One-way ANOVA). All data are representative of 3 or more separate experiments with 3-4 mice per group.

A

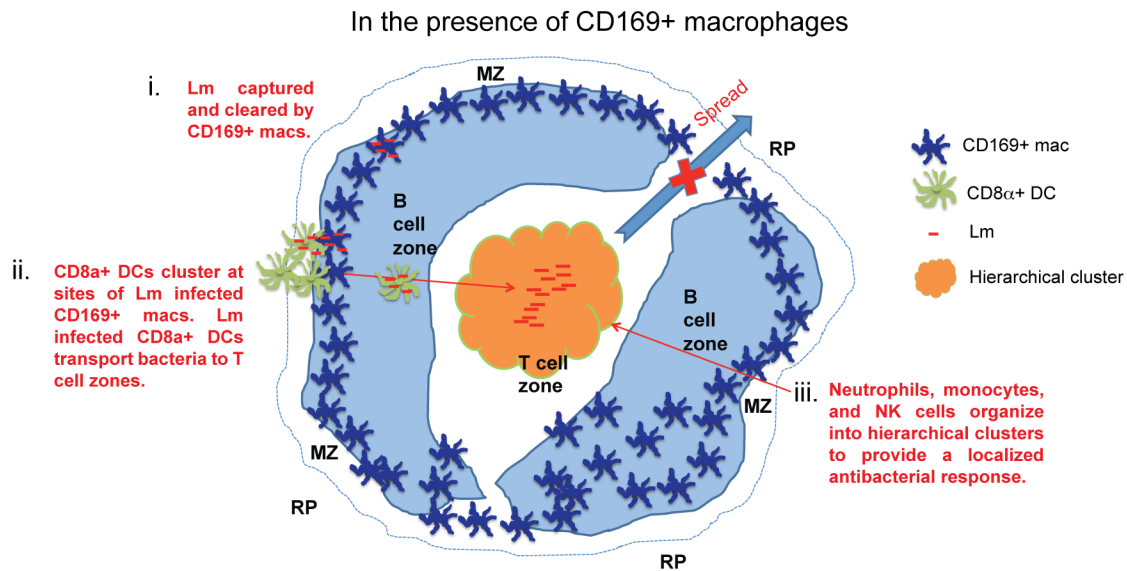

B

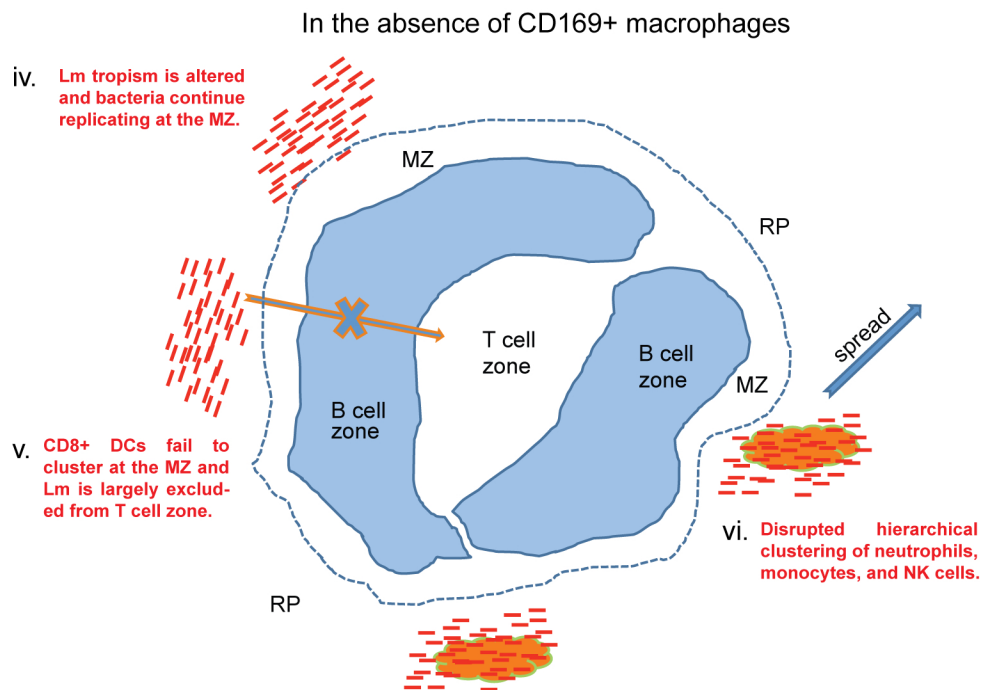

Fig. S8. Model depicting the role of CD169+ macrophages following Lm infection. (A) Top panel: (i) Following L.m. infection, bacteria are rapidly engulfed by CD169+ macrophages. The majority of bacteria are eliminated by these macrophages. However, L.m. escape from the phagolysosome initiates (ii) the recruitment of CD8α+ DCs cluster around Lm infected CD169+ macrophages, which results in the transfer of bacteria from CD169+ macrophage to CD8α+ DCs. The CD8α+ DCs then transport the bacteria to the T cell zones, where Lm continues to replicate for a brief period. Under these circumstances (iii) Lm replication is confined to splenic T cell zones where dense hierarchical clustering of neutrophils, monocytes and NK cells takes place preventing continued bacterial replication. (B) Bottom panel: In the absence of CD169+ macrophages (iv) L.m. continues to rapidly replicate unchecked in the splenic marginal zone and red pulp. (v) CD8α+ DCs fail to cluster around the L.m.-infected CD169+ macrophages. Consequently, the transfer of bacteria to the CD8α+ DCs is abrogated, which disrupts the translocation of L.m. to the T cell zones. (vi) As a result of improper L.m. localization to the T cell zones the hierarchical clustering of innate immune cells is markedly disrupted resulting in further bacterial propagation within the spleen and spread to peripheral organs.

Table S1. Top 15 GO enriched biological terms up-regulated in CD169+ macrophages versus red pulp macrophages in steady-state

| ID         | Title                               | Number of hits | P-value  | Hit names                                                                                                                                                                                                                                                                                                                                                                                                                                                                                                                                                                                                                                                                       |
|------------|-------------------------------------|----------------|----------|---------------------------------------------------------------------------------------------------------------------------------------------------------------------------------------------------------------------------------------------------------------------------------------------------------------------------------------------------------------------------------------------------------------------------------------------------------------------------------------------------------------------------------------------------------------------------------------------------------------------------------------------------------------------------------|
| GO:0002376 | Immune system process               | 110            | 3.55E-24 | Ace,Adam8,Adrg3,Adora3,Alox5,Alox5ap,Ank,Aqp9,Bik,Btla,Camp,Ccl3,Ccl5,Ccl6,Cd24a,Cd34,Cd37,Cd40,Cd7,Cd74,Cdkn1a,Chil1,Clec10a,Clnk,Cnn2,Coro1a,Csf1,Csf2,Ctsw,Cx3cr1,Cxcl16,Cxcr2,Cyp4f18,Dtx1,Fas,Fcer1a,Ffar2,Flt3,Gata3,Gmn n,Gpr183,Gzma,Gzmb,H2DMb2,H2Eb1,H2Ob,Hdc,Hoxa7,Ifi205,Il18r1,Il18rap,Il1r1,Il1rn,Il2r1,Il2ra,Il6,Il7r,Itgam,Kit,Klra17,Klre1,L1cam,Lmo1,Lmo4,Lta,Ltb,Ltb4r1,Ltf,Mmp12,Mmp9,Ndr1,Nxn,Osm,Pglyrp1,Pim2,Plac8,Prg2,Ptger3,Ptgr1,Ptpn 7,Ptprcap,Rab27a,Rarg,Relb,Retnlg,Rorc,Runx2,S100a10,S100a8,S100a9,Samsn1,Sema4a,Sema4d,Sema7a,Serpinb1a,Sh 2d3c,Sigirr,SiglecF,Socs1,Spp1,Srgn,St14,Stap1,Timeless,Tmem176a,Tmem176b,Tnfsf9,Traf1,Tspan32,Txk |
| GO:0001775 | Cell activation                     | 74             | 3.94E-22 | Adrg3,Adora3,Bik,Btla,Ccl3,Ccl5,Cd24a,Cd37,Cd40,Cd7,Cd74,Cdkn1a,Chil1,Coro1a,Csf1,Csf2,Cx3cr1,Cxcl16,Cxcr2,Dtx1,F as,Ffar2,Flt3,Gata3,Gpr183,Gzma,Gzmb,H2Ob,Hdc,Il18r1,Il18rap,Il1r1,Il2ra,Il7r,Itgam,Itgb3,Kit,Klre1,Lmo1,Lta,Ltb,Ltb4r 1,Mmp12,Ndr1,Osm,Pim2,Plac8,Ptger3,Ptpn7,Ptprcap,Rab27a,Rarg,Relb,Retnlg,Rorc,Runx2,S100a6,Samsn1,Sema4a,Se ma4d,Sema7a,Sh2d3c,Sigirr,SiglecF,Socs1,Spp1,Srgn,St14,Timeless,Tmem176a,Tnfsf9,Traf1,Tspan32,Txk                                                                                                                                                                                                                          |
| GO:0006955 | Immune response                     | 79             | 3.96E-22 | Ace,Adora3,Alox5,Alox5ap,Btla,Camp,Ccl3,Ccl5,Ccl6,Cd24a,Cd34,Cd37,Cd40,Cd7,Cd74,Chil1,Clec10a,Clnk,Coro1a,Csf2,Ct sw,Cx3cr1,Cxcl16,Cxcr2,Fas,Fcer1a,Gata3,Gpr183,Gzma,Gzmb,H2-DMb2,H2-Eb1,H2Ob,Hdc,Ifi205,Il18r1,Il18rap, Il1r1,Il1rn,Il2r1,Il2ra,Il6,Il7r,Itgam,Kit,Klra17,Klre1,Lmo4,Lta,Ltb,Ltb4r1,Ltf,Mmp9,Ndr1,Nxn,Osm,Pglyrp1,Plac8,Prg2,Pt ger3,Ptprcap,Rab27a,Rarg,Relb,Rorc,S100a8,S100a9,Sema4a,Sema4d,Sema7a,Serpinb1a,Sh2d3c,Sigirr,SiglecF,Socs1,Spp 1,St14,Tnfsf9,Txk                                                                                                                                                                                             |
| GO:0045321 | Leukocyte activation                | 70             | 1.84E-21 | Adrg3,Adora3,Bik,Btla,Ccl3,Cd24a,Cd37,Cd40,Cd7,Cd74,Cdkn1a,Chil1,Coro1a,Csf1,Csf2,Cx3cr1,Cxcl16,Cxcr2,Dtx1,Fas,FF ar2,Flt3,Gata3,Gpr183,Gzmb,H2Ob,Hdc,Il18r1,Il18rap,Il1r1,Il2ra,Il7r,Itgam,Kit,Klre1,Lmo1,Lta,Ltb,Ltb4r1,Mmp12,Ndr1, Osm,Pim2,Plac8,Ptger3,Ptpn7,Ptprcap,Rab27a,Rarg,Relb,Retnlg,Rorc,Runx2,Samsn1,Sema4a,Sema4d,Sema7a,Sh2d3c,Si girr,SiglecF,Socs1,Spp1,Srgn,St14,Timeless,Tmem176a,Tnfsf9,Traf1,Tspan32,Txk                                                                                                                                                                                                                                                 |
| GO:0001817 | Regulation of cytokine production   | 54             | 7.21E-19 | Adora3,Anxa1,Btla,Camp,Ccl3,Cd37,Cd40,Cd7,Chil1,Coro1a,Csf2,Cxcl16,Cxcr2,Fas,Ffar2,Flt3,Gata3,Gzma,Gzmb,H2Ob,Hd c,Il18r1,Il18rap,Il1r1,Il1rn,Il2ra,Il6,Itgam,Kit,Klra17,Klre1,Ltb,Ltb4r1,Mmp9,Osm,Pglyrp1,Ptger3,Ptprcap,Ramp1,Relb,Ror c,Sema4a,Sema4d,Sema7a,Serpinb1a,Sh2d3c,Sigirr,Socs1,Spp1,Srgn,Tnfsf9,Traf1,Txk,Unc119                                                                                                                                                                                                                                                                                                                                                  |
| GO:0001816 | Cytokine production                 | 55             | 4.74E-18 | Adora3,Anxa1,Btla,Camp,Ccl3,Cd37,Cd40,Cd7,Chil1,Coro1a,Csf2,Cxcl16,Cxcr2,Fas,Ffar2,Flt3,Gata3,Gzma,Gzmb,H2Ob,Hd c,Il18r1,Il18rap,Il1r1,Il1rn,Il2ra,Il6,Itgam,Kit,Klra17,Klre1,Ltb,Ltb4r1,Mmp9,Osm,Pglyrp1,Ptger3,Ptprcap,Ramp1,Rarg,Rel b,Rorc,Sema4a,Sema4d,Sema7a,Serpinb1a,Sh2d3c,Sigirr,Socs1,Spp1,Srgn,Tnfsf9,Traf1,Txk,Unc119                                                                                                                                                                                                                                                                                                                                             |
| GO:0006952 | Defense response                    | 74             | 6.41E-18 | Ace,Adam8,Adora3,Alox5,Alox5ap,Anxa1,Btla,Camp,Ccl3,Ccl5,Ccl6,Cd24a,Cd40,Cd7,Clec10a,Csf1,Csf2,Csrp2,Ctsw,Cx3cr 1,Cxcl16,Cxcr2,Fas,Fcer1a,Ffar2,Gata3,Gzma,H2DMb2,H2Eb1,Hdc,Il18r1,Il18rap,Il1r1,Il1rn,Il2r1,Il2ra,Il6,Kit,Klra17,Klre1, Lta,Ltb,Ltb4r1,Ltf,Mcpt2,Mmp12,Mmp9,Nxn,Osm,Pglyrp1,Pkp3,Prdx6,Prg2,Pstpip1,Ptger3,Ptgr1,Ptprcap,Rab27a,Rarg,R elb,Rem1,Retnlg,S100a8,S100a9,Sema4d,Sema7a,Serpinb1a,Sigirr,SiglecF,Socs1,Spp1,Spry2,Srgn,Traf1                                                                                                                                                                                                                        |
| GO:0006954 | Inflammatory response               | 57             | 3.05E-17 | Ace,Adam8,Adora3,Alox5,Alox5ap,Anxa1,Btla,Camp,Ccl3,Ccl5,Ccl6,Cd40,Cd7,Clec10a,Csf1,Csf2,Csrp2,Cx3cr1,Cxcl16,Cxcr 2,Fas,Fcer1a,Ffar2,Gata3,Gzma,H2DMb2,Hdc,Il18r1,Il1r1,Il1rn,Il2ra,Il6,Lta,Ltb4r1,Mcpt2,Mmp12,Mmp9,Osm,Pkp3,Prdx 6,Prg2,Pstpip1,Ptger3,Ptgr1,Rarg,Relb,Rem1,Retnlg,S100a8,S100a9,Sema7a,Sigirr,SiglecF,Socs1,Spp1,Srgn,Traf1                                                                                                                                                                                                                                                                                                                                   |
| GO:0009611 | Response to wounding                | 71             | 2.36E-16 | Ace,Adam8,Adora3,Alox5,Alox5ap,Anxa1,Aqp3,Btla,Camp,Ccl3,Ccl5,Ccl6,Cd40,Cd7,Clec10a,Csf1,Csf2,Csrp2,Cx3cr1,Cxcl1 6,Cxcr2,Emp3,F5,Fas,Fcer1a,Ffar2,Gata3,Gzma,H2DMb2,Hdc,Hs3st1,Il18r1,Il1r1,Il1rn,Il2ra,Il6,Itgam,Itgb3,Lta,Ltb4r1,Mc pt2,Mmp12,Mmp9,Ndr1,Osm,Pkp3,Prdx6,Prg2,Pstpip1,Ptger3,Ptgr1,Rab27a,Rarg,Relb,Rem1,Retnlg,S100a4,S100a8,S1 00a9,Sema4d,Sema7a,Sigirr,SiglecF,Socs1,Spint1,Spp1,Srgn,Thbs1,Traf1,Tspan32,Vim                                                                                                                                                                                                                                               |
| GO:0002521 | Leukocyte differentiation           | 48             | 4.02E-15 | Adam8,Adrg3,Aqp9,Bik,Btla,Cd24a,Cd40,Cd74,Coro1a,Csf1,Csf2,Dtx1,Fas,Ffar2,Flt3,Gata3,Gmn,Gpr183,Il18r1,Il1r1,Il 2ra,Il7r,Itgam,Kit,Lmo1,Lta,Ltb,Ltb4r1,Osm,Ptpn7,Rarg,Relb,Retnlg,Rorc,Runx2,S100a8,S100a9,Samsn1,Sema4a,Sema4d, Sh2d3c,Socs1,Spp1,Tmem176a,Tmem176b,Tnfsf9,Traf1,Txk                                                                                                                                                                                                                                                                                                                                                                                           |
| GO:0046649 | Lymphocyte activation               | 54             | 6.90E-15 | Adrg3,Bik,Btla,Ccl3,Cd24a,Cd37,Cd40,Cd7,Cd74,Cdkn1a,Coro1a,Csf2,Cxcl16,Dtx1,Fas,Flt3,Gata3,Gpr183,Gzmb,Hdc,Il18 r1,Il1r1,Il2ra,Il7r,Itgam,Kit,Klre1,Lmo1,Lta,Ltb,Ltb4r1,Osm,Pim2,Ptpn7,Ptprcap,Rab27a,Rarg,Relb,Rorc,Runx2,Samsn1,Se ma4a,Sema4d,Sema7a,Sh2d3c,Sigirr,Socs1,Spp1,St14,Timeless,Tnfsf9,Traf1,Tspan32,Txk                                                                                                                                                                                                                                                                                                                                                         |
| GO:0002520 | Immune system development           | 61             | 1.03E-14 | Adam8,Adrg3,Ank,Aqp9,Bik,Btla,Ccl5,Cd24a,Cd34,Cd40,Cd74,Coro1a,Csf1,Csf2,Dtx1,Fas,Ffar2,Flt3,Gata3,Gmn,Gpr183 ,Hdc,Hoxa7,Il18r1,Il1r1,Il2ra,Il7r,Itgam,Kit,Klra17,L1cam,Lmo1,Lmo4,Lta,Ltb,Ltb4r1,Mmp9,Osm,Ptpn7,Rarg,Relb,Retnlg, Rorc,Runx2,S100a8,S100a9,Samsn1,Sema4a,Sema4d,Sh2d3c,Socs1,Spp1,Srgn,St14,Stap1,Tmem176a,Tmem176b,Tnfsf9, Traf1,Tspan32,Txk                                                                                                                                                                                                                                                                                                                   |
| GO:0080134 | Regulation of response to stress    | 53             | 1.11E-14 | Ace,Adam8,Adora3,Anxa1,Camp,Ccl3,Ccl5,Cd40,Cd7,Clec10a,Coro1a,Csf2,Cxcl16,Cxcr2,F5,Ffar2,Flt3,Gata3,Gzma,Hdc,Il1 8rap,Il1r1,Il1rn,Il2ra,Il6,Itgb3,Kit,Klre1,Ltb,Ltb4r1,Ltf,Mmp12,Nxn,Osm,Pglyrp1,Pkp3,Prdx6,Ptger3,Rab27a,Relb,S100a6, S100a9,Sema4d,Sema7a,Serpinb1a,Sh2d3c,Sigirr,SiglecF,Socs1,Spp1,Srgn,Thbs1,Traf1                                                                                                                                                                                                                                                                                                                                                         |
| GO:0002682 | Regulation of immune system process | 61             | 1.31E-14 | Ace,Adora3,Ank,Btla,Camp,Ccl3,Ccl5,Cd24a,Cd37,Cd40,Cd7,Cd74,Cdkn1a,Chil1,Cnn2,Coro1a,Csf1,Csf2,Cxcl16,Cxcr2,Fas, Flt3,Gata3,Gmn,Gpr183,Gzmb,Hdc,Il18rap,Il1r1,Il1rn,Il2ra,Il6,Itgam,Itgb3,Kit,Klre1,Lta,Ltb,Ltb4r1,Ndr1,Nxn,Osm,Ptger3,Ptprca p,Rab27a,Relb,Retnlg,Rorc,Runx2,S100a10,S100a9,Sema4a,Sema4d,Sema7a,Serpinb1a,Sh2d3c,Sigirr,Socs1,Spp1,St14,Tr af1,Tspan32,Txk                                                                                                                                                                                                                                                                                                    |
| GO:0031347 | Regulation of defense response      | 41             | 1.47E-14 | Ace,Adam8,Adora3,Anxa1,Camp,Ccl3,Ccl5,Cd7,Clec10a,Csf2,Cxcl16,Ffar2,Gata3,Gzma,Hdc,Il18rap,Il1r1,Il1rn,Il2ra,Il6,Klr e1,Ltb,Ltb4r1,Ltf,Mmp12,Nxn,Osm,Pkp3,Prdx6,Ptger3,Rab27a,Relb,Sema4d,Sema7a,Serpinb1a,Sigirr,SiglecF,Socs1,Spp1, Srgn,Traf1                                                                                                                                                                                                                                                                                                                                                                                                                                |

Table S2. Top 15 GO enriched biological processes up-regulated in CD169 + macrophages during infection versus steady-state

| ID         | Title                            | Number of hits | P-value  | Hit names                                                                                                                                                                                                                                                                                                                                                                                                                                                                                                                                                                                                                                                                                                                                                                                                                                                      |
|------------|----------------------------------|----------------|----------|----------------------------------------------------------------------------------------------------------------------------------------------------------------------------------------------------------------------------------------------------------------------------------------------------------------------------------------------------------------------------------------------------------------------------------------------------------------------------------------------------------------------------------------------------------------------------------------------------------------------------------------------------------------------------------------------------------------------------------------------------------------------------------------------------------------------------------------------------------------|
| GO:0002376 | Immune system process            | 138            | 2.21E-37 | Abcb1a,Adar,Adprm,Anxa2,Arg2,Batf,Bcl2l11,Bst2,Casp1,Casp4,Ccl12,Ccnd2,Cd274,Cd40,Cd69,Cdkn1a,Chil1,Cited2,Cldn1,Clec4d,Csf2,Cx3cl1,Cxcl1,Cxcl10,Cxcl11,Cxcl3,Cxcr5,Dhx58,Dusp16,Eif2ak2,Epb41,Ets2,Etv6,Fas,Fcgr4,Fpr2,Gab2,Gadd45b,Gbp2,Gbp3,Gm12185,Gm9845,Gpr84,H2K1,H2T24,Hdc,Hipk2,Hmox1,Hrh2,Hsp90aa1,Hsph1,Htt,Ifi205,Ifi44,Ifih1,Ifit2,Ifng,Ilgp1,Il12a,Il12b,Il15,Il15ra,Il1a,Il1rn,Il21r,Il27,Il2ra,Il4ra,Il6,Ilgap1,Irf7,Irgm1,Irgm2,Irga4,Kat2b,Kdr,Klf6,Lgals9,Lipp,Irg1,Map2k1,Max,Mmp13,Msa4a6d,Msr1,Mvp,Myd88,Nampt,Ncf1,Nfkbb1,Nfkbi1,Nlrp3,Nod2,Notch1,Oas1b,Oasl2,Peli1,Phf11d,Phlpp1,Plscr1,Pml,Ppp1r15b,Ptpn1,Raggef2,Rasgrp1,Rhbdf2,Ripk2,Rsad2,S100a9,Samsn1,Satb1,Serpinb9,Signec1,Skil,Sifn3,Sifn5,Sifn8,Sosl1,Sp110,Spred1,Srgn,Stat1,Stat2,Stat3,Stip1,Taf4b,Tabpp,Tifa,Timeless,Tnfs15,Tnfs4,Tnfsf8,Traf6,Trex1,Trim21,Usp18,Wars |
| GO:0051707 | Response to other organism       | 89             | 9.82E-32 | Adar,Arg2,Bcl2l11,Bst2,C130026121Rik,Carhsp1,Casp1,Casp4,Ccl12,Ccnd2,Cd274,Cd40,Cd69,Cldn1,Clec4e,Csf2,Cx3cl1,Cxcl1,Cxcl10,Cxcl11,Cxcl3,Cxcr5,Dhx58,Eif2ak2,Fas,Gadd45b,Gbp3,Gm12185,Gm5431,Gm9845,Gpr84,Gvin1,H2K1,H2T24,Hdc,Hrh2,Ifi44,Ifih1,Ifit1,Ifit2,Ifit3b,Ifng,Ilgp1,Il12a,Il12b,Il15,Il15ra,Il1a,Il1rn,Il27,Il2ra,Il4ra,Il6,Irf7,Irgm1,Irgm2,Irga4,Irga5,Lipp,Lrp8,Mapk13,Msr1,Myd88,Ncf1,Nfkbb1,Nlrp3,Nod2,Notch1,Oas1b,Oas3,Oasl1,Oasl2,Olfr56,Pfkfb3,Plscr1,Rhbdf2,Ripk2,Rsad2,S100a9,Serpinb9,Sifn5,Sifn8,Sp110,Srgn,Stat1,Stat3,Tabpp,Tifa,Tnfs4,Trim21,Usp18,Xdh,Zbp1                                                                                                                                                                                                                                                                           |
| GO:0009607 | Response to biotic stimulus      | 91             | 4.25E-31 | Adar,Arg2,Bcl2l11,Bst2,C130026121Rik,Carhsp1,Casp1,Casp4,Ccl12,Ccnd2,Cd274,Cd40,Cd69,Cited2,Cldn1,Clec4e,Csf2,Cx3cl1,Cxcl1,Cxcl10,Cxcl11,Cxcl3,Cxcr5,Dhx58,Eif2ak2,Fas,Gadd45b,Gbp3,Gm12185,Gm5431,Gm9845,Gpr84,Gvin1,H2K1,H2T24,Hdc,Hrh2,Ifi44,Ifih1,Ifit1,Ifit2,Ifit3b,Ifng,Ilgp1,Il12a,Il12b,Il15,Il15ra,Il1a,Il1rn,Il27,Il2ra,Il4ra,Il6,Irf7,Irgm1,Irgm2,Irga4,Irga5,Lipp,Lrp8,Mapk13,Msr1,Myd88,Ncf1,Nfkbb1,Nlrp3,Nod2,Notch1,Oas1b,Oas3,Oasl1,Oasl2,Olfr56,Pfkfb3,Plscr1,Rhbdf2,Ripk2,Rsad2,S100a9,Serpinb9,Sifn5,Sifn8,Sp110,Srgn,Stat1,Stat3,Tabpp,Tifa,Tnfs4,Trim21,Ubxn4,Usp18,Xdh,Zbp1                                                                                                                                                                                                                                                              |
| GO:0006952 | Defense response                 | 94             | 1.70E-27 | Abcb1a,Adar,Arg2,Bcl2l11,Bst2,Casp1,Casp4,Ccl12,Cd274,Cd40,Cd69,Cldn1,Clec4e,Csf2,Cx3cl1,Cxcl1,Cxcl10,Cxcl11,Cxcl3,Dhx58,Eif2ak2,Fas,Fpr2,Gab2,Gbp2,Gbp3,Gem,Gm12185,Gm5431,Gm9845,Gpr84,H2K1,H2T24,Hdc,Hmox1,Hrh2,Ifi44,Ifih1,Ifit2,Ifng,Ilgp1,Il12a,Il12b,Il15,Il15ra,Il1a,Il1rn,Il27,Il2ra,Il4ra,Il6,Irf7,Irgm1,Irgm2,Irga4,Irga5,Lipp,Lrp8,Mapk13,Msr1,Myd88,Ncf1,Nfkbb1,Nlrp3,Nod2,Notch1,Oas1b,Oas3,Oasl1,Oasl2,Olfr56,Pfkfb3,Plscr1,Pml,Procr,Rasgrp1,Rhbdf2,Ripk2,Rsad2,S100a9,Serpinb9,Signec1,Slc7a11,Sp110,Srgn,Stat1,Stat3,Tabpp,Tifa,Tnfs4,Trip3,Tp1, Traf6, Trim21, Usp18, Zbp1                                                                                                                                                                                                                                                                  |
| GO:0006955 | Immune response                  | 90             | 3.17E-26 | Adar,Adprm,Arg2,Batf,Bcl2l11,Bst2,Casp1,Casp4,Cd274,Cd40,Cd69,Chil1,Clec4d,Csf2,Cx3cl1,Cxcl1,Cxcl10,Cxcl11,Cxcr5,Dhx58,Eif2ak2,Epb41,Fas,Fcgr4,Gab2,Gadd45b,Gbp2,Gbp3,Gm12185,Gm9845,Gpr84,H2-K1,H2-T24,Hdc,Hmox1,Hrh2,Hsph1,Ifi205,Ifi44,Ifih1,Ifit2,Ifng,Ilgp1,Il12a,Il12b,Il15,Il15ra,Il1a,Il1rn,Il21r,Il2ra,Il4ra,Il6,Irf7,Irgm1,Irgm2,Irga4,Irga5,Lipp,Mapk13,Msr1,Myd88,Nfkbb1,Nlrp3,Nod2,Notch1,Oasl2,Peli1,Pfkfb3,Phlpp1,Plscr1,Pml,Procr,Rasgrp1,Rhbdf2,Ripk2,Rsad2,S100a9,Serpinb9,Sifn5,Sifn8,Sp110,Srgn,Stat1,Stat3,Tabpp,Tifa,Tnfs15,Tnfs4,Traf6,Trex1,Trim21,Usp18,Wars                                                                                                                                                                                                                                                                          |
| GO:0051704 | Multi-organism process           | 96             | 3.20E-26 | Adar,Arg2,Bcl2l11,Bst2,C130026121Rik,Carhsp1,Casp1,Casp4,Ccl12,Ccnd2,Cd274,Cd40,Cd69,Cldn1,Clec4e,Csf2,Cx3cl1,Cxcl1,Cxcl10,Cxcl11,Cxcl3,Cxcr5,Dhx58,Eif2ak2,Fas,Gadd45b,Gbp3,Gm12185,Gm5431,Gm9845,Gpr84,Gpr85,Gvin1,H2-K1,H2-T24,Hdc,Hrh2,Hsp90ab1,Ifi44,Ifih1,Ifit2,Ifit3b,Ifng,Ilgp1,Il12a,Il12b,Il15,Il15ra,Il1a,Il1rn,Il27,Il2ra,Il4ra,Il6,Irf7,Irgm1,Irgm2,Irga4,Irga5,Lipp,Lrp8,Mapk13,Msr1,Myd88,Ncf1,Nfkbb1,Nlrp3,Nod2,Notch1,Oas1b,Oas3,Oasl1,Oasl2,Olfr56,Pfkfb3,Plscr1,Pml,Rhbdf2,Ripk2,Rsad2,S100a9,Serpinb9,Sifn5,Sifn8,Sp110,Srgn,Stat1,Stat3,Tabpp,Tifa,Tnfs4,Trim21,Trim25,Usp18,Xdh,Zbp1                                                                                                                                                                                                                                                     |
| GO:0009617 | Response to bacterium            | 61             | 3.76E-24 | Adar,Arg2,Bcl2l11,Carhsp1,Casp1,Casp4,Ccl12,Ccnd2,Cd274,Cd40,Clec4e,Csf2,Cx3cl1,Cxcl1,Cxcl10,Cxcl11,Cxcl3,Cxcr5,Fas,Gbp3,Gm9845,Gpr84,Gvin1,Hdc,Hrh2,Ifit1,Ifit2,Ifng,Ilgp1,Il12a,Il12b,Il15,Il15ra,Il1a,Il1rn,Il27,Il2ra,Il4ra,Il6,Irf7,Irgm1,Irgm2,Irga4,Irga5,Lipp,Mapk13,Msr1,Myd88,Ncf1,Nfkbb1,Nod2,Pfkfb3,Plscr1,Rhbdf2,Ripk2,Rsad2,S100a9,Serpinb9,Sifn5,Sp110,Srgn,Stat1,Stat3,Tifa,Tnfs4,Usp18,Xdh,Zbp1                                                                                                                                                                                                                                                                                                                                                                                                                                               |
| GO:0006954 | Inflammatory response            | 67             | 1.07E-21 | Abcb1a,Arg2,Casp1,Casp4,Ccl12,Cd274,Cd40,Cd69,Clec4e,Csf2,Cx3cl1,Cxcl1,Cxcl10,Cxcl11,Cxcl3,Eif2ak2,Fas,Fpr2,Gab2,Gm12185,Gm9847,Gpr84,Hdc,Hmox1,Hrh2,Ifng,Ilgp1,Il12a,Il12b,Il15,Il15ra,Il1a,Il1rn,Il27,Il2ra,Il4ra,Il6,Irf7,Irgm2,Irga4,Irga5,Lipp,Mapk13,Msr1,Myd88,Ncf1,Nfkbb1,Nlrp3,Nod2,Peli1,Pfkfb3,Procr,Rasgrp1,Ripk2,S100a9,Serpinb9,Signec1,Slc7a11,Srgn,Stat1,Stat3,Tnfs4,Trip3,Tp1,Traf6,Trim21,Usp18                                                                                                                                                                                                                                                                                                                                                                                                                                              |
| GO:0009615 | Response to virus                | 40             | 1.23E-21 | Adar,Bcl2l11,Bst2,C130026121Rik,Ccl12,Cd40,Cd69,Cldn1,Cx3cl1,Cxcl1,Cxcl10,Dhx58,Eif2ak2,Fas,Gadd45b,Gm12185,Ifih1,Ifit2,Ifit3b,Ifng,Il12b,Il15,Il2ra,Irf7,Msr1,Myd88,Nlrp3,Notch1,Oas1b,Oas3,Oasl1,Oasl2,Plscr1,Rsad2,Stat1,Stat3,Tabpp,Tnfs4,Trim21,Usp18                                                                                                                                                                                                                                                                                                                                                                                                                                                                                                                                                                                                     |
| GO:0009611 | Response to wounding             | 83             | 1.13E-20 | Abcb1a,Anxa2,Areg,Arg2,Casp1,Casp4,Ccl12,Cd274,Cd40,Cd69,Cited2,Clec4e,Csf2,Cx3cl1,Cxcl1,Cxcl10,Cxcl11,Cxcl3,Eif2ak2,Epb41,Fas,Fn1,Fpr2,Gab2,Gja4,Gjb2,Gm12185,Gm9845,Gm9847,Gpr84,Hdc,Hmox1,Hrh2,Ifng,Ilgp1,Il12a,Il12b,Il15,Il15ra,Il1a,Il1rn,Il27,Il2ra,Il4ra,Il6,Irf7,Irgm2,Irga4,Irga5,Kdr,Klf6,Lgals9,Lipp,Lrp8,Mapk13,Mapk13,Mmp13,Msr1,Myd88,Ncf1,Nfkbb1,Nlrp3,Nod2,Notch1,Peli1,Pfkfb3,Procr,Rasgrp1,Ripk2,S100a9,Serpinb9,Signec1,Slc7a11,Srgn,Stat1,Stat3,Thbs1,Tnfs15,Tnfs4,Trip3,Tp1,Traf6,Trim21,Usp18                                                                                                                                                                                                                                                                                                                                           |
| GO:0045087 | Innate immune response           | 42             | 2.19E-20 | Adar,Arg2,Bcl2l11,Bst2,Casp1,Casp4,Cd274,Csf2,Cx3cl1,Cxcl1,Cxcl11,Dhx58,Eif2ak2,Gbp2,Gbp3,Hmox1,Hrh2,Ifih1,Ifit2,Ilgp1,Il12a,Il12b,Il15,Il15ra,Il2ra,Irf7,Irgm1,Irgm2,Myd88,Nod2,Peli1,Pml,Rhbdf2,Ripk2,Rsad2,Serpinb9,Sp110,Stat1,Stat3,Tifa,Trim21,Usp18                                                                                                                                                                                                                                                                                                                                                                                                                                                                                                                                                                                                     |
| GO:0080134 | Regulation of response to stress | 65             | 2.76E-20 | Arg2,Bcl2l11,Casp1,Cd274,Cd40,Cited2,Csf2,Cx3cl1,Cxcl1,Cxcl3,Dhx58,Dusp16,Eif2ak2,Epb41,Etv6,Fpr2,Gab2,Gadd45b,Gm9845,Gm9847,Hdc,Hmox1,Hrh2,Hsph1,Ifih1,Il12a,Il12b,Il15,Il15ra,Il1rn,Il27,Il2ra,Il4ra,Il6,Irf7,Irgm2,Irga4,Kdm2b,Lrp8,Msr1,Myd88,Ncf1,Nlrp3,Nod2,Peli1,Pfkfb3,Phlpp1,Plscr1,Pml,Procr,Ptpn1,Rasgrp1,Ripk2,S100a9,Serpinb9,Signec1,Sp110,Srgn,Stat1,Stat3,Thbs1,Tnfs4,Traf6,Trim21,Usp18                                                                                                                                                                                                                                                                                                                                                                                                                                                       |
| GO:0001816 | Cytokine production              | 61             | 4.71E-20 | Arg2,Bcl2l11,Bst2,Carhsp1,Casp1,Casp4,Cd274,Cd40,Cd69,Chil1,Csf2,Cx3cl1,Cxcl10,Dusp16,Eif2ak2,Epb41,Fas,Fcgr4,Gab2,Gm9847,Gpr84,Hdc,Hmox1,Hrh2,Hsph1,Ifih1,Ifng,Il12a,Il12b,Il15,Il15ra,Il1a,Il1rn,Il27,Il2ra,Il4ra,Il6,Irf7,Irga4,Mmp13,Msa4a4c,Msr1,Myd88,Nampt,Nfkbb1,Nfkbi1,Nlrp3,Nod2,Pfkfb3,Rasgrp1,Rhbdf2,Ripk2,Rsad2,Srgn,Stat1,Stat3,Tnfs15,Tnfs4,Traf6,Trim21,Usp18                                                                                                                                                                                                                                                                                                                                                                                                                                                                                  |
| GO:0006950 | Response to stress               | 135            | 5.54E-20 | Abcb1a,Adar,Anxa2,Areg,Arg2,Bcl2l11,Bst2,Casp1,Casp4,Ccl12,Ccnd2,Cd274,Cd40,Cd69,Cdkn1a,Cited2,Cldn1,Clec4e,Csf2,Cx3cl1,Cxcl1,Cxcl10,Cxcl11,Cxcl3,Dhx58,Dram1,Dusp16,Eif2ak2,Epb41,Etv6,Fas,Fn1,Fpr2,Gab2,Gadd45b,Gbp2,Gbp3,Gem,Gja4,Gjb2,Gm12185,Gm5431,Gm9845,Gm9847,Gpr84,H2-K1,H2-T24,Hdc,Hipk2,Hmox1,Hrh2,Hsp90aa1,Hsp90ab1,Hspa2,Hsph1,Htt,Ifi44,Ifih1,Ifit2,Ifng,Ilgp1,Il12a,Il12b,Il15,Il15ra,Il1a,Il1rn,Il27,Il2ra,Il4ra,Il6,Irf7,Irgm1,Irgm2,Irga4,Irga5,Kdm2b,Kdr,Klf6,Lipp,Lrp8,Map2k1,Mapk13,Mdm2,Mfsd2a,Mmp13,Msr1,Myd88,Myo6,Nampt,Ncf1,Nfkbb1,Nlrp3,Nod2,Notch1,Oas1b,Padp7,Parp3,Pde5a,Peli1,Pfkfb3,Phlpp1,Plscr1,Pml,Ppp1r15b,Procr,Ptpn1,Rab20,Rasgrp1,Rhbdf2,Ripk2,Rsad2,S100a9,Serpinb9,Signec1,Slc7a11,Sp110,Srgn,Stat1,Stat3,Stip1,Tabpp,Thbs1,Tifa,Timeless,Tnfs15,Tnfs4,Trip3,Tp1,Traf6,Trex1,Trim21,Ubxn4,Usp18,Zbp1                 |
| GO:0031347 | Regulation of defense response   | 47             | 3.19E-17 | Arg2,Bcl2l11,Cd274,Csf2,Cx3cl1,Cxcl1,Cxcl3,Dhx58,Eif2ak2,Fpr2,Gm9847,Hdc,Hmox1,Hrh2,Ifih1,Il12a,Il12b,Il15,Il15ra,Il1rn,Il27,Il2ra,Il4ra,Il6,Irf7,Irgm2,Irga4,Msr1,Myd88,Ncf1,Nlrp3,Nod2,Peli1,Pfkfb3,Phlpp1,Plscr1,Pml,Ripk2,Serpinb9,Signec1,Sp110,Srgn,Stat1,Stat3,Tnfs4,Trim21,Usp18                                                                                                                                                                                                                                                                                                                                                                                                                                                                                                                                                                       |



Table S3. Top 15 GO enriched biological processes down-regulated in CD169 + macrophages during infection versus steady-state

| ID         | Title                                                  | Number of hits | P-value  | Hit names                                                                                                                                                                                                                                                                                                                                                                                                                                                                                                                                                                                                                                                                                                                                                                                                                                                                                                                                                                                                                            |
|------------|--------------------------------------------------------|----------------|----------|--------------------------------------------------------------------------------------------------------------------------------------------------------------------------------------------------------------------------------------------------------------------------------------------------------------------------------------------------------------------------------------------------------------------------------------------------------------------------------------------------------------------------------------------------------------------------------------------------------------------------------------------------------------------------------------------------------------------------------------------------------------------------------------------------------------------------------------------------------------------------------------------------------------------------------------------------------------------------------------------------------------------------------------|
| GO:0044237 | Cellular metabolic process                             | 152            | 3.17E-07 | Abcd2,Acaa2,Acp6,Acyp1,Ak8,Akr7a5,Aldoc,Anapc11,Anapc13,Aqp3,Arl4d,Asb2,Ascc1,Asnsd1,Atp5g2,Atp5h,Atraid,B230118H07Rik,B4gat1,BC026585,Bckdha,Bckdk,Cbr3,Cbx3,Cbx8,Cd1d1,Cdc26,Celf4,Cenpv,Chst12,Cox6b2,Cox7a2l,D10Jhu81e,Dbi,Dcxr,Dffb,Dguok,Dna2,Dnase11l,Dpep2,Dusp6,Dusp7,Dut,E2f1,Ech1,Eif3f,Elk3,Entpd6,Epor,Erp29,Exosc5,Fam105a,Fbxl6,Flt3,Ftsj2,Gamt,Gba2,Gm10175,Gpi1,Gpn3,Guk1,Gusb,H2DMb2,H2afv,Hadh,Haghl,Hes6,Hist3h2ba,Hmgcl,Hoxa7,Hpgd,Hscb,Igflr1,Illvl,Impa2,Khk,Klhdc2,Klh6,Klrd1,Maf1,Map2k6,Mcee,Mdp1,Med30,Mfng,Mpp6,Mri1,Mrpl34,Mrps16,Msh2,Mvk,Mxd4,Naca,Naga,Ndufa2,Ndufa6,Ndufb8,Ndufc2,Neurl2,Nmb,Nr1d1,Nsa2,Nudt14,Nudt16,Obfc1,Ormdl1,P3h2,Paip2,Paqr7,Pat1,Pdia5,Phpt1,Pigx,Pik3ip1,Pnk4,Pold4,Polr1e,Polr2e,Prr5,Ptger3,Ptgis,Ptp4a3,Ptpn18,Ptprcap,Pts,Pygo2,Ramp1,Rbfa,Rpa3,Rpl10ps3,Rpl36al,Rps13ps2,Rps16ps2,Rxrb,S100a10,Scp2,Sept4,Sgsh,Sigirr,Slc2a8,Slc35c2,Snrpg,Spr,Spsb2,Syce2,Tspyl4,Ube2e2,Uqcrh,Use1,Zfp467,Zfp61,Zfp740                                                               |
| GO:0008152 | Metabolic process                                      | 163            | 2.81E-06 | Abcd2,Acaa2,Acp6,Acyp1,Ak8,Akr7a5,Aldoc,Anapc11,Anapc13,Aqp3,Arl4d,Asb2,Ascc1,Asnsd1,Atp5g2,Atp5h,Atraid,B230118H07Rik,B4gat1,BC026585,Bckdha,Bckdk,Car3,Cbr3,Cbx3,Cbx8,Cd1d1,Cdc26,Celf4,Cenpv,Chst12,Cnpy2,Cox6b2,Cox7a2l,Cuta,D10Jhu81e,Dbi,Dcxr,Dffb,Dguok,Dna2,Dnase11l,Dpep2,Dpm3,Dtx1,Dusp6,Dusp7,Dut,E2f1,Ebpl,Ech1,Eif3f,Elk3,Engase,Entpd6,Epor,Erp29,Exosc5,Fam105a,Fbxl6,Flt3,Ftsj2,Gamt,Gba2,Gm10175,Gpi1,Gpn3,Guk1,Gusb,H2DMb2,H2Oa,H2afv,Hadh,Haghl,Hes6,Hist3h2ba,Hmgcl,Hoxa7,Hpgd,Hscb,Igflr1,Illvl,Impa2,Khk,Klhdc2,Klh6,Klrd1,Lage3,Maf1,Map2k6,Mcee,Mdp1,Med30,Mfng,Mmp12,Mpp6,Mri1,Mrpl34,Mrps16,Msh2,Mvk,Mxd4,Naca,Naga,Ndufa2,Ndufa6,Ndufb8,Ndufc2,Neurl2,Nmb,Nr1d1,Nsa2,Nudt14,Nudt16,Obfc1,Ormdl1,P3h2,Paip2,Paqr7,Pat1,Pdia5,Phpt1,Pigx,Pik3ip1,Pnk4,Pold4,Polr1e,Polr2e,Prr5,Prss30,Ptger3,Ptgis,Ptp4a3,Ptpn18,Ptprcap,Pts,Pygo2,Ramp1,Rbfa,Rpa3,Rpl10ps3,Rpl36al,Rps13ps2,Rps16ps2,Rxrb,S100a10,Scp2,Sept4,Sgsh,Sigirr,Slc2a8,Slc35c2,Snrpg,Spr,Spsb2,Syce2,Tspyl4,Ube2e2,Uqcrh,Use1,Zfp467,Zfp61,Zfp740 |
| GO:0022904 | Respiratory electron transport chain                   | 6              | 2.74E-05 | Cox6b2,Cox7a2l,Ndufa6,Ndufb8,Ndufc2,Uqcrh                                                                                                                                                                                                                                                                                                                                                                                                                                                                                                                                                                                                                                                                                                                                                                                                                                                                                                                                                                                            |
| GO:0044282 | Small molecule catabolic process                       | 12             | 5.98E-05 | [Abcd2,Aldoc,Bckdha,Dcxr,Ech1,Gamt,Gba2,Gpi1,Hadh,Hmgcl,Rxrb,Scp2]                                                                                                                                                                                                                                                                                                                                                                                                                                                                                                                                                                                                                                                                                                                                                                                                                                                                                                                                                                   |
| GO:0022900 | Electron transport chain                               | 6              | 8.90E-05 | [Cox6b2,Cox7a2l,Ndufa6,Ndufb8,Ndufc2,Uqcrh]                                                                                                                                                                                                                                                                                                                                                                                                                                                                                                                                                                                                                                                                                                                                                                                                                                                                                                                                                                                          |
| GO:0072329 | Monocarboxylic acid catabolic process                  | 7              | 1.12E-04 | [Abcd2,Ech1,Gamt,Gba2,Hadh,Rxrb,Scp2]                                                                                                                                                                                                                                                                                                                                                                                                                                                                                                                                                                                                                                                                                                                                                                                                                                                                                                                                                                                                |
| GO:0042773 | ATP synthesis coupled electron transport               | 5              | 1.25E-04 | [Cox6b2,Ndufa6,Ndufb8,Ndufc2,Uqcrh]                                                                                                                                                                                                                                                                                                                                                                                                                                                                                                                                                                                                                                                                                                                                                                                                                                                                                                                                                                                                  |
| GO:0042775 | Mitochondrial ATP synthesis coupled electron transport | 5              | 1.25E-04 | [Cox6b2,Ndufa6,Ndufb8,Ndufc2,Uqcrh]                                                                                                                                                                                                                                                                                                                                                                                                                                                                                                                                                                                                                                                                                                                                                                                                                                                                                                                                                                                                  |
| GO:0044281 | Small molecule metabolic process                       | 45             | 1.32E-04 | [Abcd2,Acaa2,Ak8,Akr7a5,Aldoc,Asnsd1,Atp5g2,Atp5h,BC026585,Bckdha,Bckdk,Cenpv,Dbi,Dcxr,Dguok,Dpep2,Dusp6,Ebpl,Ech1,Entpd6,Gamt,Gba2,Gm10175,Gpi1,Guk1,Hadh,Hmgcl,Hpgd,Illvl,Khk,Mpp6,Mvk,Nudt14,Nudt16,Paqr7,Ptger3,Ptgis,Pts,Ramp1,Rxrb,S100a10,Scp2,Sept4,Slc2a8,Spr]                                                                                                                                                                                                                                                                                                                                                                                                                                                                                                                                                                                                                                                                                                                                                              |
| GO:0009081 | Branched chain family amino acid metabolic process     | 4              | 2.01E-04 | [Bckdha,Bckdk,Hmgcl,Illvl]                                                                                                                                                                                                                                                                                                                                                                                                                                                                                                                                                                                                                                                                                                                                                                                                                                                                                                                                                                                                           |
| GO:0016054 | Organic acid catabolic process                         | 9              | 2.18E-04 | [Abcd2,Bckdha,Ech1,Gamt,Gba2,Hadh,Hmgcl,Rxrb,Scp2]                                                                                                                                                                                                                                                                                                                                                                                                                                                                                                                                                                                                                                                                                                                                                                                                                                                                                                                                                                                   |
| GO:0046395 | Carboxylic acid catabolic process                      | 9              | 2.18E-04 | [Abcd2,Bckdha,Ech1,Gamt,Gba2,Hadh,Hmgcl,Rxrb,Scp2]                                                                                                                                                                                                                                                                                                                                                                                                                                                                                                                                                                                                                                                                                                                                                                                                                                                                                                                                                                                   |
| GO:0043617 | Cellular response to sucrose starvation                | 2              | 2.26E-04 | [Ascc1,Nsa2]                                                                                                                                                                                                                                                                                                                                                                                                                                                                                                                                                                                                                                                                                                                                                                                                                                                                                                                                                                                                                         |
| GO:0006119 | Oxidative phosphorylation                              | 6              | 2.30E-04 | [Cox6b2,Ndufa2,Ndufa6,Ndufb8,Ndufc2,Uqcrh]                                                                                                                                                                                                                                                                                                                                                                                                                                                                                                                                                                                                                                                                                                                                                                                                                                                                                                                                                                                           |
| GO:0006635 | Fatty acid beta-oxidation                              | 6              | 2.30E-04 | [Abcd2,Ech1,Gamt,Hadh,Rxrb,Scp2]                                                                                                                                                                                                                                                                                                                                                                                                                                                                                                                                                                                                                                                                                                                                                                                                                                                                                                                                                                                                     |

Table S4. List of identified transcription factor candidates for up-regulated genes in CD169+ macrophages isolated from infected mice versus uninfected mice

| ID                 | Mean CD169 12h Inf (FPKM) | Gene description                                                              | Gene symbol |
|--------------------|---------------------------|-------------------------------------------------------------------------------|-------------|
| ENSMUSG0000001911  | 3.48353                   | nuclear factor I/X                                                            | Nfix        |
| ENSMUSG00000002111 | 211.16185                 | spleen focus forming virus (SFFV) proviral integration oncogene               | Spi1        |
| ENSMUSG00000002147 | 58.33423                  | signal transducer and activator of transcription 6                            | Stat6       |
| ENSMUSG00000002325 | 58.71892                  | interferon regulatory factor 9                                                | Irf9        |
| ENSMUSG00000003154 | 2.33393                   | forkhead box J2                                                               | Foxj2       |
| ENSMUSG00000003184 | 35.22463                  | interferon regulatory factor 3                                                | Irf3        |
| ENSMUSG00000003545 | 46.16813                  | FBJ osteosarcoma oncogene B                                                   | Fosb        |
| ENSMUSG00000004040 | 125.16703                 | signal transducer and activator of transcription 3                            | Stat3       |
| ENSMUSG00000004043 | 16.61893                  | signal transducer and activator of transcription 5A                           | Stat5a      |
| ENSMUSG00000004661 | 4.19606                   | AT rich interactive domain 3B (BRIGHT-like)                                   | Arid3b      |
| ENSMUSG00000005893 | 1.27888                   | group C,member 2,nuclear receptor subfamily 2                                 | Nr2c2       |
| ENSMUSG00000008496 | 13.81689                  | POU domain,class 2,transcription factor 2                                     | Pou2f2      |
| ENSMUSG00000009739 | 2.94284                   | POU domain,class 6,transcription factor 1                                     | Pou6f1      |
| ENSMUSG00000019564 | 2.78987                   | AT rich interactive domain 3A (BRIGHT-like)                                   | Arid3a      |
| ENSMUSG00000019947 | 2.87096                   | AT rich interactive domain 5B (MRF1-like)                                     | Arid5b      |
| ENSMUSG00000020160 | 1.99312                   | Meis homeobox 1                                                               | Meis1       |
| ENSMUSG00000020919 | 20.76732                  | signal transducer and activator of transcription 5B                           | Stat5b      |
| ENSMUSG00000021250 | 239.80267                 | FBJ osteosarcoma oncogene                                                     | Fos         |
| ENSMUSG00000021356 | 9.63148                   | interferon regulatory factor 4                                                | Irf4        |
| ENSMUSG00000022508 | 15.18419                  | B cell leukemia/lymphoma 6                                                    | Bcl6        |
| ENSMUSG00000022556 | 8.74937                   | heat shock factor 1                                                           | Hsf1        |
| ENSMUSG00000022641 | 14.45411                  | bobby sox homolog (Drosophila)                                                | Bbx         |
| ENSMUSG00000024927 | 52.10485                  | v-rel reticuloendotheliosis viral oncogene homolog A (avian)                  | Rela        |
| ENSMUSG00000025225 | 142.85440                 | nuclear factor of kappa light polypeptide gene enhancer in B cells 2,p49/p100 | Nfkb2       |
| ENSMUSG00000025498 | 1318.16779                | interferon regulatory factor 7                                                | Irf7        |
| ENSMUSG00000025612 | 22.38609                  | BTB and CNC homology 1,basic leucine zipper transcription factor 1            | Bach1       |
| ENSMUSG00000025880 | 5.03151                   | SMAD family member 7                                                          | Smad7       |
| ENSMUSG00000026565 | 1.11197                   | POU domain,class 2,transcription factor 1                                     | Pou2f1      |
| ENSMUSG00000026815 | 2.83134                   | growth factor independent 1B                                                  | Gfi1b       |
| ENSMUSG00000028163 | 141.82010                 | nuclear factor of kappa light polypeptide gene enhancer in B cells 1,p105     | Nfkb1       |
| ENSMUSG00000028717 | 2.09910                   | T cell acute lymphocytic leukemia 1                                           | Tal1        |
| ENSMUSG00000029135 | 29.24672                  | fos-like antigen 2                                                            | Fosl2       |
| ENSMUSG00000029771 | 169.35239                 | interferon regulatory factor 5                                                | Irf5        |
| ENSMUSG00000030557 | 11.09849                  | myocyte enhancer factor 2A                                                    | Mef2a       |
| ENSMUSG00000031627 | 61.00421                  | interferon regulatory factor 2                                                | Irf2        |
| ENSMUSG00000031885 | 40.41235                  | core binding factor beta                                                      | Cbfb        |
| ENSMUSG00000032053 | 16.06835                  | POU domain,associating factor 1,class 2                                       | Pou2af1     |
| ENSMUSG00000032998 | 4.96541                   | forkhead box J3                                                               | Foxj3       |
| ENSMUSG00000034271 | 17.47371                  | Jun dimerization protein 2                                                    | Jdp2        |
| ENSMUSG00000034957 | 3.57919                   | CCAAT/enhancer binding protein (C/EBP),alpha                                  | Cebpa       |
| ENSMUSG00000037447 | 125.09685                 | AT rich interactive domain 5A (MRF1-like)                                     | Arid5a      |
| ENSMUSG00000037992 | 14.32806                  | alpha,retinoic acid receptor                                                  | Rara        |
| ENSMUSG00000039153 | 4.36355                   | runt related transcription factor 2                                           | Runx2       |
| ENSMUSG00000042903 | 3.08227                   | forkhead box O4                                                               | Foxo4       |
| ENSMUSG00000047141 | 2.25304                   | zinc finger protein 654                                                       | Zfp654      |
| ENSMUSG00000048756 | 3.87127                   | forkhead box O3                                                               | Foxo3       |
| ENSMUSG00000052534 | 7.54392                   | pre B cell leukemia homeobox 1                                                | Pbx1        |
| ENSMUSG00000052684 | 129.88570                 | jun proto-oncogene                                                            | Jun         |
| ENSMUSG00000052837 | 521.61200                 | jun B proto-oncogene                                                          | Junb        |
| ENSMUSG00000055053 | 2.33381                   | nuclear factor I/C                                                            | Nfic        |
| ENSMUSG00000056216 | 7.90125                   | CCAAT/enhancer binding protein (C/EBP),gamma                                  | Cebpg       |
| ENSMUSG00000056493 | 4.10002                   | forkhead box K1                                                               | Foxk1       |
| ENSMUSG00000056501 | 99.98105                  | CCAAT/enhancer binding protein (C/EBP),beta                                   | Cebpb       |
| ENSMUSG00000057469 | 3.75573                   | E2F transcription factor 6                                                    | E2f6        |
| ENSMUSG00000059475 | 3.40205                   | zinc finger protein 426                                                       | Zfp426      |
| ENSMUSG00000062175 | 2.92555                   | TGFB-induced factor homeobox 2                                                | Tgif2       |
| ENSMUSG00000071076 | 74.01905                  | jun D proto-oncogene                                                          | Jund        |
| ENSMUSG00000074220 | 1.51117                   | zinc finger protein 382                                                       | Zfp382      |

Table S5. Enriched immune-related GO terms for corresponding transcription factors in CD169+ macrophages during infection versus steady-state

| ID         | Title                                                                                                                     | Number of hits | P-value     | Hit names                                                                                                                                                                                      |
|------------|---------------------------------------------------------------------------------------------------------------------------|----------------|-------------|------------------------------------------------------------------------------------------------------------------------------------------------------------------------------------------------|
| GO:0002682 | Regulation of immune system process                                                                                       | 28             | 2.30E-18    | Bcl6,Cebpb,Cebpg,Fos,Foxo3,Hsf1,Irf2,Irf3,Irf4,Irf5,Irf7,Irf9,Idp2,Junb,Meis1,Nfic,Nfkb1,Nfkb2,Pbx1,Pou2af1,Rara,Runx2,Smad7,Spi1,Stat3,Stat5a,Stat6,Tal1                                      |
| GO:0002520 | Immune system development                                                                                                 | 27             | 2.82E-17    | Arid3a,Bcl6,Cbfb,Cebpb,Cebpg,Fos,Foxo3,Gfi1b,Irf2,Irf4,Irf5,Irf9,Idp2,Junb,Meis1,Nfkb1,Nfkb2,Pbx1,Pou2af1,Pou2f1,Rara,Runx2,Spi1,Stat3,Stat5a,Stat6,Tal1,Zfp426                                |
| GO:0002376 | Immune system process                                                                                                     | 34             | 2.38E-16    | Arid3a,Bcl6,Cbfb,Cebpb,Cebpg,Fos,Foxo3,Gfi1b,Hsf1,Irf2,Irf3,Irf4,Irf5,Irf, Irf9,Idp2,Junb,Meis1,Nfic,Nfkb1,Nfkb2,Pbx1,Pou2af1,Pou2f1,Rara,Rela,Runx2,Smad7,Spi1,Stat3,Stat5a,Stat6,Tal1,Zfp426 |
| GO:0006955 | Immune response                                                                                                           | 22             | 9.75E-11    | Arid3a,Bcl6,Cbfb,Cebpb,Cebpg,Fos,Irf2,Irf3,Irf4,Irf5,Irf7,Irf9,Junb,Nfkb1,Nfkb2,Pou2af1,Rela,Smad7,Spi1,Stat3,Stat5a,Stat6                                                                     |
| GO:0002697 | Regulation of immune effector process                                                                                     | 13             | 8.93E-10    | Bcl6,Cebpb,Cebpg,Fos,Hsf1,Irf2,Irf3,Irf4,Irf9,Junb,Nfkb1,Stat3,Stat6                                                                                                                           |
| GO:0002252 | Immune effector process                                                                                                   | 15             | 1.47E-09    | Bcl6,Cebpb,Cebpg,Fos,Hsf1,Irf2,Irf3,Irf4,Irf9,Junb,Nfkb1,Pou2af1,Stat3,Stat5a,Stat6                                                                                                            |
| GO:0050776 | Regulation of immune response                                                                                             | 15             | 2.27E-09    | Bcl6,Cebpb,Cebpg,Fos,Irf2,Irf3,Irf4,Irf7,Irf9,Junb,Nfkb1,Pou2af1,Spi1,Stat3,Stat6                                                                                                              |
| GO:0002440 | Production of molecular mediator of immune response                                                                       | 10             | 1.01E-08    | Bcl6,Hsf1,Irf3,Irf4,Irf9,Junb,Nfkb1,Pou2af1,Stat3,Stat6                                                                                                                                        |
| GO:0002377 | Immunoglobulin production                                                                                                 | 9              | 1.46E-08    | Bcl6,Hsf1,Irf3,Irf4,Irf9,Junb,Nfkb1,Pou2af1,Stat6                                                                                                                                              |
| GO:0002366 | Leukocyte activation involved in immune response                                                                          | 9              | 2.60E-07    | Bcl6,Fos,Irf2,Irf4,Irf9,Junb,Nfkb1,Stat5a,Stat6                                                                                                                                                |
| GO:0002443 | Leukocyte mediated immunity                                                                                               | 9              | 2.87E-06    | Bcl6,Cebpb,Fos,Irf4,Irf9,Junb,Nfkb1,Pou2af1,Stat6                                                                                                                                              |
| GO:0045087 | Innate immune response                                                                                                    | 9              | 3.61E-06    | Cebpb,Cebpg,Irf2,Irf3,Irf4,Irf7,Irf9,Nfkb1,Stat3                                                                                                                                               |
| GO:0002285 | Lymphocyte activation involved in immune response                                                                         | 7              | 4.14E-06    | Bcl6,Irf2,Irf4,Irf9,Nfkb1,Stat5a,Stat6                                                                                                                                                         |
| GO:0002286 | T cell activation involved in immune response                                                                             | 6              | 4.21E-06    | Bcl6,Irf2,Irf4,Nfkb1,Stat5a,Stat6                                                                                                                                                              |
| GO:0002699 | positive regulation of immune effector process                                                                            | 6              | 4.62E-06    | Cebpg,Fos,Hsf1,Irf4,Junb,Stat6                                                                                                                                                                 |
| GO:0002460 | Adaptive immune response based on somatic recombination of immune receptors built from immunoglobulin superfamily domains | 7              | 1.31E-04    | Bcl6,Cebpb,Irf4,Irf9,Nfkb1,Pou2af1,Stat6                                                                                                                                                       |
| GO:0010758 | Regulation of macrophage chemotaxis                                                                                       | 3              | 4.10E-04    | Irf3,Irf7,Nfic                                                                                                                                                                                 |
| GO:0048246 | Macrophage chemotaxis                                                                                                     | 3              | 0.001409857 | Irf3,Irf7,Nfic                                                                                                                                                                                 |

Table S6. Antibodies used for FACS and confocal microscopy

| Antibody      | Company           | Clone/Cat. no. |
|---------------|-------------------|----------------|
| CD45          | Invitrogen        | 30-F11         |
| CD11b         | Biologend         | M1/70          |
| CD11c         | Biologend         | N418           |
| CD169         | eBioscience       | Ser-4          |
| CD8 $\alpha$  | eBioscience       | 53-6.7         |
| NK1.1         | Biologend         | PK136          |
| CD3           | Biologend         | 145-2C11       |
| B220          | eBioscience       | RA3-6B2        |
| IgD           | Biologend         | 11-26c.2a      |
| MHCII         | Biologend         | AF6-120.1      |
| F4/80         | Biologend         | BM8            |
| Ly6C          | Biologend         | HK1.4          |
| Ly6G          | Biologend         | 18A            |
| CCR2          | R&D Systems       | FAB5538P       |
| CD16/32       | Biologend         | 93             |
| UV Live-Dead  | Invitrogen        | A-10168        |
| IFN- $\gamma$ | BD Bioscience     | XMG1.2         |
| Listeria      | Fisher Scientific | DF2302-50-0    |

## Supplementary Movie Legends:

**Movie S1. *Listeria* is captured by CD169<sup>+</sup> macrophages early after infection.** 3D reconstruction of the combined z stacks image shown in Fig.1B. The isosurfaced masking of the cellular volume using the CD169 fluorescence shows that the bacteria is inside CD169<sup>+</sup> macrophage at 3 hpi. (Lm; green, CD169; Blue)

**Movie S2. *Listeria* is captured by CD169<sup>+</sup> macrophages early after infection.** Another example of isosurfaced masking of the cellular volume using the CD169 fluorescence showing the bacteria inside CD169<sup>+</sup> macrophage at 3 hpi. (Lm; green, CD169; Blue, CD11c; red)

**Movie S3. CD169<sup>+</sup> macrophages transfer bacteria to CD8 $\alpha$ <sup>+</sup> DCs.** 3D reconstruction of the combined z stacks image shown in Fig.3C depicting the apparent transfer of bacteria by the CD169<sup>+</sup> macrophages to CD8 $\alpha$ <sup>+</sup> DC. Note that the CD8 $\alpha$ <sup>+</sup> DC interacts closely with the infected CD169<sup>+</sup> macrophage. (Lm; green, CD169; Blue, CD11c; red)
